# 1 Separable neural signatures of confidence during perceptual decisions

2 Balsdon, T.<sup>1\*</sup>, Mamassian, P.<sup>1\*\*</sup>, and Wyart, V.<sup>2\*\*</sup>

3 1. Laboratoire des Systèmes Perceptifs (CNRS UMR 8248), DEC, ENS, PSL University, 75005 Paris,  
4 France

5 2. Laboratoire de Neurosciences Cognitives et Computationnelles (Inserm U960), DEC, ENS, PSL  
6 University, 75005, Paris, France

7 \* Corresponding author

8 \*\* Equal contributors

## 9 Abstract

10 Perceptual confidence is an evaluation of the validity of perceptual decisions. While there is behavioural  
11 evidence that confidence evaluation differs from perceptual decision-making, disentangling these two  
12 processes remains a challenge at the neural level. Here we examined the electrical brain activity of human  
13 participants in a protracted perceptual decision-making task where observers tend to commit to perceptual  
14 decisions early whilst continuing to monitor sensory evidence for evaluating confidence. Premature decision  
15 commitments were revealed by patterns of spectral power overlying motor cortex, followed by an  
16 attenuation of the neural representation of perceptual decision evidence. A distinct neural representation  
17 was associated with suboptimalities affecting confidence reports, with sources localised in the superior  
18 parietal and orbitofrontal cortices. In agreement with a dissociation between perception and confidence,  
19 these neural resources were recruited even after observers committed to their perceptual decisions, and  
20 thus delineate an integral neural circuit for the computation of confidence. [148 words]

## 21 Introduction

22 Whilst perception typically feels effortless and automatic, it requires probabilistic inference to resolve the  
23 uncertain causes of essentially ambiguous sensory input (Helmholtz, 1856). Human observers are capable of  
24 discriminating which perceptual decisions are more likely to be correct using subjective feelings of  
25 confidence (Pollack and Decker, 1958). These feelings of perceptual confidence have been associated with  
26 metacognitive processes (Fleming and Daw, 2017) that enable self-monitoring for learning (Veenman,  
27 Wilhelm, & Beishuizen, 2004) and communication (Bahrami et al., 2012; Frith, 2012). We are only just  
28 beginning to uncover the complex functional role of metacognition in human behaviour, and outline the  
29 computational and neural processes that enable metacognition. The study of perceptual confidence offers  
30 promising insight into metacognition, because one can use our detailed knowledge of perceptual processes  
31 to isolate factors which affect the computation of perceptual confidence.

32 At the computational level, perceptual decisions are described by sequential sampling processes (Vickers,  
33 1970; Ratcliff, 1978; Pleskac and Busmeyer, 2010), in which noisy samples of evidence are accumulated

34 over time, until there is sufficient evidence to commit to a decision. Perceptual confidence tends to reflect  
 35 the quantity and quality of evidence used to make the perceptual decision (Vickers, 1979; Kepecs et al.,  
 36 2008; Moreno-Bote, 2010). In this way, perceptual confidence is necessarily tethered to decision evidence:  
 37 more evidence for the perceptual decision yields greater perceptual accuracy, and therefore higher  
 38 confidence. This makes it difficult to dissociate what processes could be specifically involved in the  
 39 computation of confidence beyond the underlying perceptual processes. Indeed, confidence (or a non-  
 40 human primate proxy for confidence) can be reliably predicted from the firing rates of neurons coding the  
 41 perceptual decision itself (Kiani and Shadlen, 2009), suggesting that confidence may be a direct by-product  
 42 of perceptual processing.

43 However, a large body of behavioural studies suggest that confidence is affected by additional sources of  
 44 noise that do not influence perceptual decisions (Bang, Shekhar and Rahnev, 2019; Shekhar and Rahnev,  
 45 2020). And conversely, the precision of perceptual confidence can be boosted by integrating additional  
 46 information, such as decision time (Kiani, Corthell, and Shadlen, 2014) or continued evidence accumulation  
 47 after the observer commits to a perceptual decision (Baranski and Petrusic, 1994; Pleskac and Busemeyer,  
 48 2010). Together these factors mean that the same perceptual decision evidence can lead to different levels of  
 49 confidence, explaining the diverse range of confidence precision displayed by human observers, and  
 50 suggesting essential differences in the processes for perceptual and confidence decisions. Moreover,  
 51 evidence suggesting that confidence precision is correlated across different tasks (such as memory and  
 52 perception; Mazancieux et al., 2018) further calls into question whether confidence is a mere consequence of  
 53 perceptual processes, or rather, recruits specialised metacognitive resources that operate across cognition,  
 54 incurring similar suboptimalities in evaluating any cognitive process.

55 In this experiment we aimed to delineate the neural processes contributing to perception and confidence,  
 56 using electroencephalography (EEG). We exploited a protracted decision-making task in which the evidence  
 57 presented to the observer can be carefully controlled. On each trial, the observer was presented with a  
 58 sequence of visual stimuli, oriented Gabor patches, which offer a specific amount of evidence towards the  
 59 perceptual decision. The orientations were sampled from one of two overlapping circular Gaussian  
 60 distributions, and the observer was asked to categorise which distribution the orientations were sampled  
 61 from. We manipulated the amount of evidence presented such that the observer tends to covertly commit to  
 62 their perceptual decision before evidence presentation has finished, whilst continuing to monitor ongoing  
 63 evidence for assessing their confidence (Balsdon et al., 2020). These covert decisions were evident from  
 64 behaviour and computational modelling, and we show similarities between the neural processes of decision-  
 65 making across conditions of immediate and delayed response execution.

66 Human behaviour was compared to an optimal observer who perfectly accumulates all the presented  
 67 evidence for perceptual decisions and confidence evaluation. The optimal observer must accurately encode  
 68 the stimulus orientation, the decision update relevant for the categorisation, and add this to the accumulated  
 69 evidence for making the perceptual decision. We uncovered dynamic neural representations of these  
 70 variables, and examined how the precision of these representations fluctuate with behavioural

suboptimalities. We found two distinct representations of the accumulated evidence where imprecision in the representation was related to suboptimal behaviour in the perceptual decisions and confidence evaluations respectively. The noise contributing to the imprecision of the confidence representation was localised to the Superior Parietal and Orbitofrontal cortices. Whilst the perceptual representation was attenuated following covert decisions, the confidence representation continued to reflect evidence accumulation. This is consistent with a neural circuit that can be recruited for confidence evaluation independently of perceptual processes, providing empirical evidence for the theoretical dissociation between perception and confidence.

## Results

### The computational architecture of perceptual confidence

Human observers ( $N = 20$ ) performed two versions of the task whilst EEG was recorded. Across the two tasks, 100 predefined sequences of oriented Gabors were repeated for each observer, with stimuli presented as described in **Figure 1a**. In the Free task, the sequence continued until observers entered their perceptual decision (**Figure 1b**), indicating which category (**Figure 1d**) they thought the orientations were sampled from. Observers were instructed to enter their response as soon as they ‘felt ready’, on three repeats of each predefined sequence (300 trials in total). In the Replay task (**Figure 1c**), observers were shown a specific number of samples and could only enter their response after the response cue. After entering their perceptual (Type-I) decision, they made a confidence (Type-II) evaluation, how confident they were that their perceptual decision was correct, on a 4-point scale. Importantly, the number of samples shown in the Replay task was manipulated relative to the Free task, in three intermixed conditions: in the Less condition, they were shown two fewer than the minimum they had chosen to respond to over the three repeats of that predefined sequence in the Free task; in the Same condition they were shown the median number of samples; and in the More condition, four more than the maximum (**Figure 1e**). The variability across repeats in the Free task means that in the More condition, observers were shown at least four additional stimuli, but often more than that.

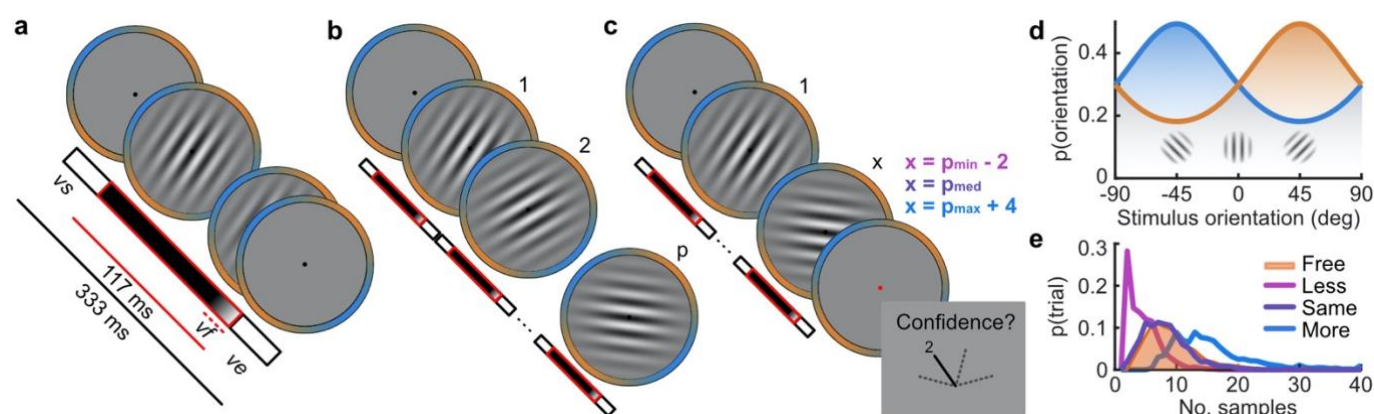

**Figure 1. Procedure.** a) Stimulus presentation: stimuli were presented at an average rate of 3 Hz, but with variable onset and offset ( $vs \in [83, 133]$  ms,  $vs_s + ve_{s-1} \geq 216$  ms; see **Methods**). Stimuli were presented

99 within a circular annulus which acted as a colour guide for the category distributions. The colour guide and the  
 100 fixation point were present throughout the trial. **b)** Free task: on each trial observers were presented with a  
 101 sequence of oriented Gabors, which continued until the observer entered their response (or 40 samples were  
 102 shown). 100 sequences were predefined and repeated three times. **c)** Replay task: The observer was presented  
 103 with a specific number of samples and could only enter their response after the cue (fixation changing to red).  
 104 The number of samples ( $x$ ) was determined relative to the number the observer chose to respond to on that  
 105 same sequence in the Free task ( $p$ ). There were three intermixed conditions, Less ( $x = p_{min} - 2$ ; where  $p_{min}$  is the  
 106 minimum  $p$  of the three repeats), Same ( $x = p_{med}$ ; where  $p_{med}$  is the median  $p$ ) and More ( $x = p_{max} + 4$ ; where  $p_{max}$   
 107 is the maximum  $p$  of the three repeats of that predefined sequence). **d)** Categories were defined by circular  
 108 Gaussian distributions over the orientations, with means  $-45^\circ$  (blue) and  $45^\circ$  (orange), and concentration  $\kappa =$   
 109 **0.5**. The distributions overlapped such that an orientation of  $45^\circ$  was most likely drawn from the orange  
 110 distribution but could also be drawn from the blue distribution with lower likelihood. **e)** Distributions of the  
 111 number of samples per trial in the Free task, and Replay task conditions (over all observers).

112 Based on previous findings (Balsdon et al., 2020) we expected observers to prematurely commit to  
 113 perceptual decisions in the More condition, whilst continuing to monitor sensory evidence for evaluating  
 114 their confidence. Replicating previous results (Balsdon et al., 2020), we found that perceptual decision  
 115 sensitivity was significantly decreased in the Less condition compared to those same ( $p_{min}$ ) trials in the Free  
 116 task (Wilcoxon sign rank  $Z = 3.88$ ,  $p < 0.001$ , Bonferroni corrected for three comparisons), there was no  
 117 significant difference for the Same condition ( $Z = 1.21$ ,  $p = 0.23$ , uncorrected), nor the More condition ( $Z =$   
 118  $1.53$ ,  $p = 0.13$ , uncorrected; despite at least an additional four samples being presented compared to the  $p_{max}$   
 119 trials; **Figure 2a**). In addition, reaction times in the More condition were significantly decreased compared  
 120 to the Same condition (on average, 60 ms faster;  $Z(19) = 2.58$ ,  $p = 0.010$ ; **Figure 2b**).

121 This lack of substantial increase in performance in the More condition could be the result of either a  
 122 performance ceiling effect or a premature commitment to the perceptual decision. The former explanation  
 123 reflects a limitation of the perceptual evidence accumulation process, whereas the latter refers to an active  
 124 mechanism that ignores the final sensory evidence. We compared these two hypotheses using a  
 125 computational modelling approach (Balsdon et al., 2020; see **Methods**). Specifically, we compared a model  
 126 in which performance in the More condition is limited by the suboptimalities evident from the Same and the  
 127 Less conditions (inference noise, and temporal integration bias, see **Supplementary Note 1**), to a model in  
 128 which performance could be impacted by a covert bound at which point observers commit to a decision  
 129 irrespective of additional evidence. Cross-validated model comparison provided significant evidence that  
 130 observers were implementing a covert bound (mean relative increase in model log-likelihood = 0.048,  
 131 bootstrapped  $p = 0.001$ , **Figure 2c**). The winning model provided a good description of the data (red open  
 132 markers in **Figure 2a**).

133 In contrast to what we found for the perceptual decision, there was no evidence that observers were  
 134 implementing a covert bound on confidence: Implementing the same bound as the perceptual decision did  
 135 not improve the fit (relative improvement with bound = -0.007, bootstrapped  $p = 0.11$ , uncorrected) and an

independent bound actually significantly *reduced* the fit compared to continued accumulation (relative improvement = -0.014,  $p = 0.022$ , Bonferroni corrected for two comparisons; **Figure 2c**). We obtained further distinctions between perceptual and confidence processes through computational modelling: additional noise was required to explain the confidence ratings, along with a separate temporal bias. The best description of both perceptual and confidence responses was provided by a partially dissociated computational architecture (full details in **Supplementary Note 1**), where perceptual and confidence decisions are based on the same noisy representation of the sensory evidence, but confidence accumulation incurs additional noise and can continue after the completion of perceptual decision processes (**Figure 2d**). These computational differences between perceptual decisions and confidence evaluations result in deviations between the inference errors associated with perceptual and confidence decisions (see **Supplementary Note 2** for model simulations).

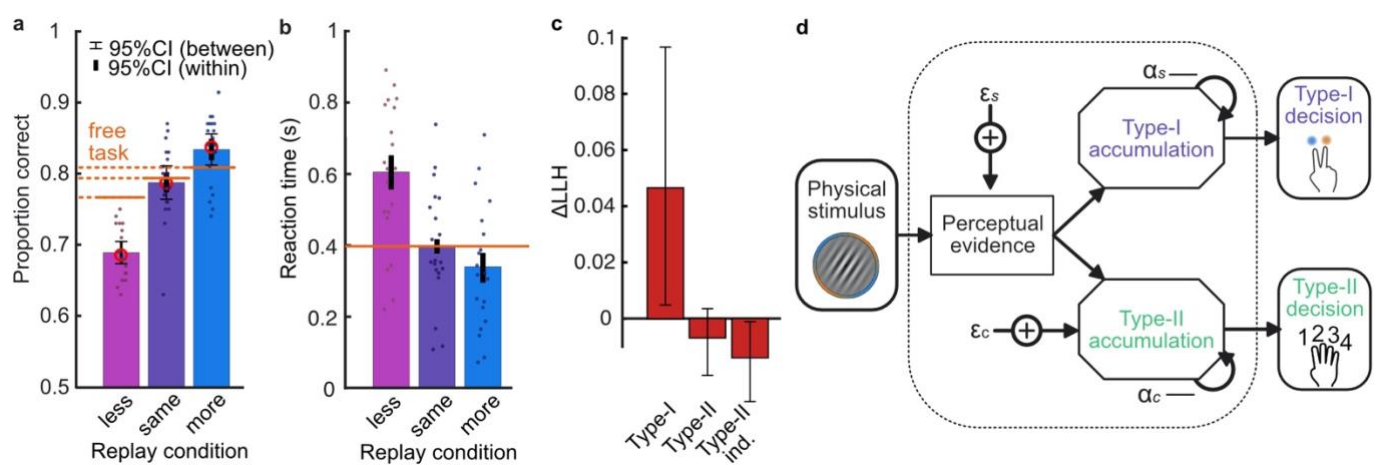

**Figure 2. Behaviour and computational modelling.** **a)** Proportion correct in each condition of the Replay task, relative to the Free task (orange horizontal lines). Individual data are shown in scattered points, error bars show 95% between- (thin) and 95% within- (thick) subject confidence intervals. Open red markers show the model prediction. **b)** Median reaction time (from response cue) in each condition of the Replay task, error bars show 95% within-subject confidence intervals, the orange horizontal line shows the non-decision time estimated in the Free task, based on computational modelling. Individual data are shown in scattered points. **c)** Difference in log-likelihood of the models utilising a covert bound relative to the models with no covert bound. On the left, the model fitting perceptual decisions only. The middle bar shows the difference in log-likelihood of the fit to confidence ratings with identical perceptual and confidence bounds. The right bar shows the difference in log-likelihood of the fit to confidence ratings of the model with an independent bound for confidence evidence accumulation. Error bars show 95% between-subject confidence intervals. **d)** Computational architecture of perceptual and confidence decisions. Perceptual (Type-I) and confidence (Type-II) decisions accumulate the same noisy perceptual evidence, but confidence is affected by additional noise ( $\epsilon_c$ ) and a separate temporal bias ( $\alpha_c$ ). This partial dissociation allows Type-II accumulation to continue after the observer has committed to a perceptual decision.



## Model-free EEG analysis

We first examined EEG amplitude modulations around the time of the response: the CPP (Central-Parietal Positivity; O'Connell et al., 2012) and the LRP (Lateralised Readiness Potential; Deecke et al., 1976). There were significant differences in the CPP and the LRP between the More and the Less conditions of the Replay task (for the CPP, from -500 prior to the response, the largest cluster showing  $t_{ave}(19) = -2.85$ ,  $p_{cluster} = 0.006$ ; for the LRP, from just after the response, the first cluster from 32 to 196 ms;  $t_{ave}(19) = -3.57$ ,  $p_{cluster} < 0.002$ ; **Figure 3**, left). There were also differences based on perceptual decision accuracy (for CPP, the main cluster emerges from -156 ms to 592 ms around the response;  $t_{ave}(19) = 4.38$ ,  $p_{cluster} < 0.002$ ; and LRP from -84 ms to 652 ms around the response, with the largest difference just after the response,  $t_{ave}(19) = 2.81$ ,  $p_{cluster} < 0.002$ ; **Figure 3**, middle). There was no significant difference in the LRP between trials with high confidence (ratings of 3 and 4) and low confidence (ratings of 1 and 2), but a substantial difference was observed in the CPP (from 250 ms prior to the response;  $t_{ave}(19) = 4.46$ ,  $p_{cluster} < 0.002$ ; **Figure 3**, right), in line with previous findings (e.g. Herding et al., 2019). These modulations are consistent with the differences in the underlying accumulated evidence driving observers' responses. We aimed to more closely examine the neural processes underlying these broad effects on EEG amplitude, especially with respect to the distinctions between perceptual decision-making and confidence evaluation, as identified by the computational model of behaviour: perceptual decision processes can conclude prior to the confidence evaluation processes, and rely on a representation of the evidence that incurs distinct inference errors.

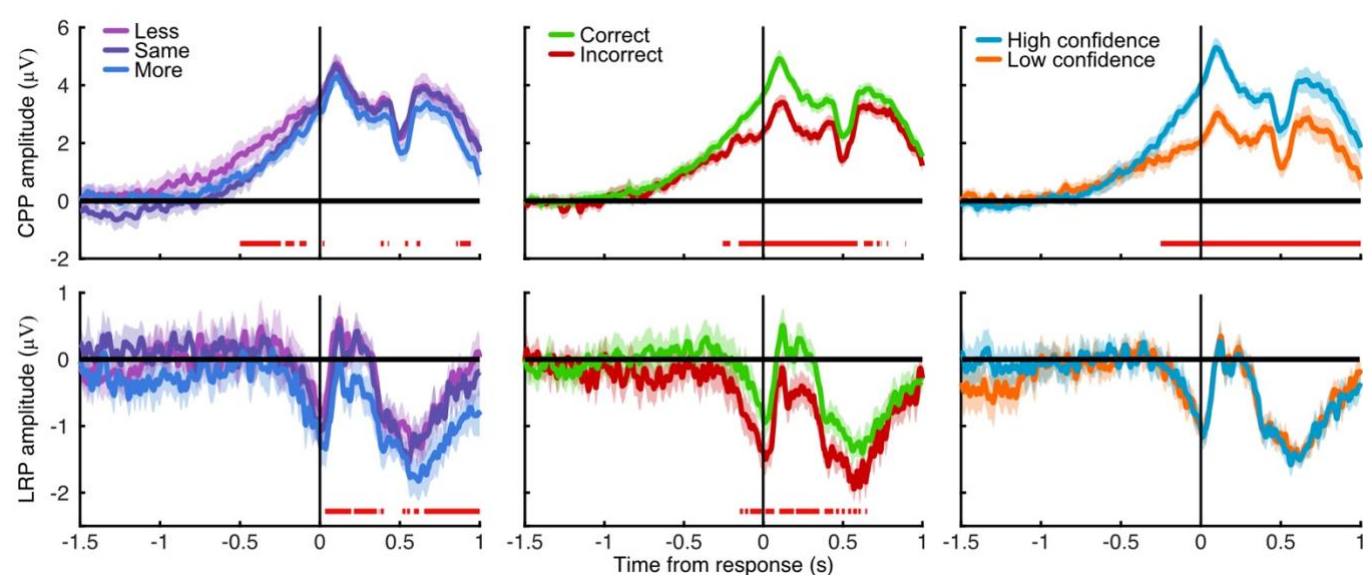

**Figure 3. Amplitude modulations with task variables.** Central-Parietal Positivity (CPP, top) and Lateralised Readiness Potential (LRP, bottom), within condition (Less/Same/More; left), correct and incorrect perceptual responses (middle), and high and low confidence ratings (right). Vertical black lines mark the time of the response, red horizontal lines mark cluster corrected significant differences. Shaded regions show 95% within-subject confidence intervals.

# 187 EEG signatures of premature perceptual decision commitment

188 We examined the neural signatures of perceptual decision commitment using a linear discriminant analysis  
 189 of the spectral power of band-limited EEG oscillations (see **Methods**). A classifier was trained to  
 190 discriminate observers' perceptual decisions based on the spectral power in 8 to 32 Hz frequency bands at  
 191 time-points leading up to the response in the Free task (**Supplementary Note 4**). This classifier was then  
 192 tested across time in each condition of the Replay task, to trace the progression of perceptual decision-  
 193 making in comparison to the Free task (where decisions are directly followed by response execution). There  
 194 were opposite asymmetries in the cross-classification of the Less and the More conditions (**Figure 4a**).  
 195 Statistical comparison revealed substantial clusters of significant differences (**Figure 4b**): Training around -  
 196 0.78 to 0.44 s from the time of the response in the Free task led to significantly better accuracy testing in the  
 197 More condition than in the Less condition, prior to when the response was entered (for the cluster testing at  
 198 -2.5 to -1.6 s  $Z_{ave} = 2.04$ ,  $p_{cluster} = 0.002$ ; testing at -1.5 to -1 s,  $Z_{ave} = 1.95$ ,  $p_{cluster} = 0.01$ ; testing at -0.8 to -0.3,  
 199  $Z_{ave} = 2.32$ ,  $p_{cluster} < 0.001$ ). This pattern of findings suggests that observers were not only committing to their  
 200 perceptual decision early, but already preparing their motor response, which would explain the faster  
 201 reaction times in the More condition (**Figure 2b**).

202 We found that the accumulated evidence over all samples could predict the strength of the neural signature  
 203 of response execution (mean  $\beta = 0.11$ ,  $t(19) = 3.89$ ,  $p < 0.001$ ; **Figure 4c**). For the Same and Less conditions,  
 204 the weight on the accumulated evidence appeared to decrease as evidence was accumulated to samples  
 205 further prior from the response. But, in the More condition, the evidence accumulated up to four samples  
 206 prior to the response still predicted the classifier response ( $t(19) = 3.81$ ,  $p = 0.001$ ). This difference between  
 207 conditions over samples is evidenced by a significant interaction based on a repeated measures ANOVA  
 208 ( $F(8,152) = 2.429$ ,  $p = 0.05$ , after Bonferroni correction for three comparisons). Leading up to the response,  
 209 the accumulated evidence becomes increasingly predictive of the strength of the neural signature of  
 210 response execution, except in the More condition, where this prediction is already accurate up to four  
 211 samples prior to the response: After committing to a perceptual decision, the observer's perceptual response  
 212 is no longer influenced by additional evidence.

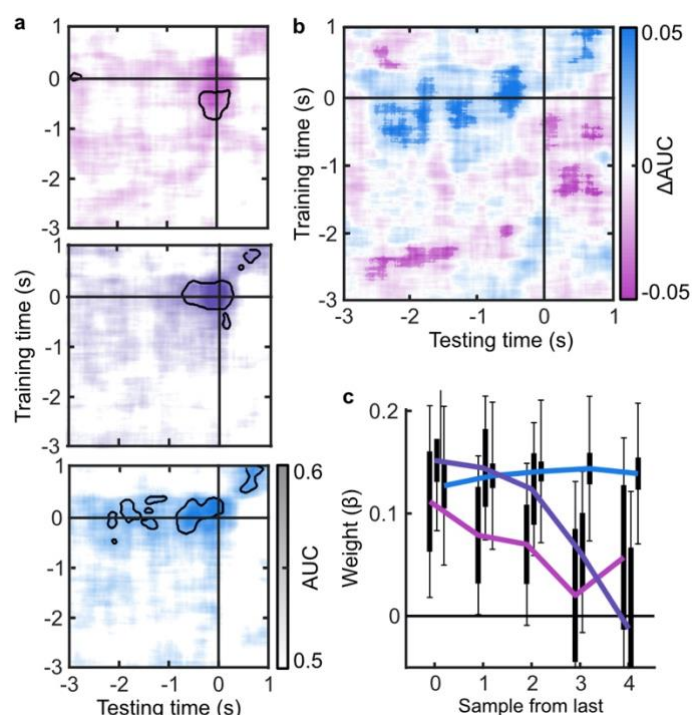

**Figure 4. EEG signatures of premature perceptual decisions.** **a)** Classifier AUC training at each time-point in the Free task and testing across time in the Less (top), Same (middle), and More (bottom) conditions of the Replay task. Black contours encircle regions where the mean is 3.1 standard deviations from chance (0.5; 99% confidence). **b)** Difference in AUC between the More and Less conditions. Cluster corrected significant differences are highlighted. **c)** The relationship between the evidence accumulated up to  $n$  samples prior to the response cue and the strength of the neural signature of response execution in each condition. Error bars show 95% within- (thick) and between-subject (thin) confidence intervals.

## Representations of decision evidence in EEG signals

To perform this task the optimal observer must encode the orientation of the stimulus, estimate the decision update based on the categories, and add this to the accumulated evidence for discriminating between the categories (Wyart et al., 2012; Wyart et al., 2015). We examined the neural representation of these optimal variables using a regression analysis with the EEG signals (evoked response, bandpass filtered between 1 and 8 Hz, see **Methods**). **Figure 5a** shows the time course of the neural coding of stimulus orientation, momentary decision update, and accumulated evidence, locked to stimulus onset. The representations of these variables showed distinct time courses and relied on distinct patterns of EEG activity over scalp topography (**Figure 5b**). There was a transient representation of stimulus orientation localised over occipital electrodes. The representation of the momentary decision update was maintained for a longer duration, initially supported by occipital electrodes, then increasingly localised over central-parietal electrodes. The representation of the accumulated evidence was sustained even longer and relied on both frontal and occipital electrodes.

The precision with which the EEG representations reflect the optimal decision variables can be compared with observers' suboptimal inference, based on whether the observers' behavioural responses matched those of an optimal observer. For each variable, we estimated the representation precision separately for epochs leading to suboptimal behavioural responses, and responses that matched those of the optimal observer (Replay task epochs only; **Figure 5c**; **Supplementary Note 3**). For perceptual decisions, the optimal observer responds with the correct category. For confidence evaluations, the optimal observer gives high confidence on trials with greater than the median evidence (over all trials) for their perceptual response. The precision of the representation of stimulus orientation did not significantly vary with behavioural suboptimalities. The representation precision of the momentary decision update showed a significant effect of perceptual decision suboptimality from 380 to 468 ms ( $F_{avg}(1,19) = 7.97$ ,  $p_{cluster} = 0.008$ )



and a significant interaction between perceptual and confidence suboptimalities from 396 to 468 ms ( $F_{avg}(1,19) = 6.66$ ,  $p_{cluster} = 0.022$ ) and from 716 to 856 ms ( $F_{avg}(1,19) = 10.75$ ,  $p_{cluster} < 0.001$ ). The largest effects were seen in the representation precision of the accumulated evidence. Representation precision was significantly reduced in epochs leading to suboptimal perceptual decisions from 108 ms post stimulus onset to the end of the epoch ( $F_{avg}(1,19) = 13.65$ ,  $p_{cluster} < 0.001$ ). In addition, there was a significant interaction with suboptimal confidence from 696 to 836 ms ( $F_{avg}(1,19) = 8.72$ ,  $p_{cluster} = 0.005$ ). The precision of the EEG representations showed distinct associations with the suboptimality of behavioural responses.

The presence of a covert bound implies that, after the observer commits to a decision, they no longer incorporate additional evidence for that decision. We should therefore see significant decreases in the precision of representations that specifically contribute to perceptual evidence accumulation. Indeed, the precision of the early representation of accumulated evidence was significantly attenuated for the last four samples of the More condition (in which observers were likely to have already committed to a decision), compared to the last four samples of the Less condition (where observers were unlikely to have committed to a decision; from the start of the epoch to 424 ms, **Figure 5d**;  $t_{avg}(19) = -5.19$ ,  $p_{cluster} < 0.001$ ). These differences in representation precision were not present for the encoding of stimulus orientation, nor the decision update, nor was the decreased precision evident in a comparison of the first four samples (**Supplementary Note 5**). Together, these comparisons suggest that different aspects of these evolving EEG representations of decision variables are related to the neural processes for perception and confidence.

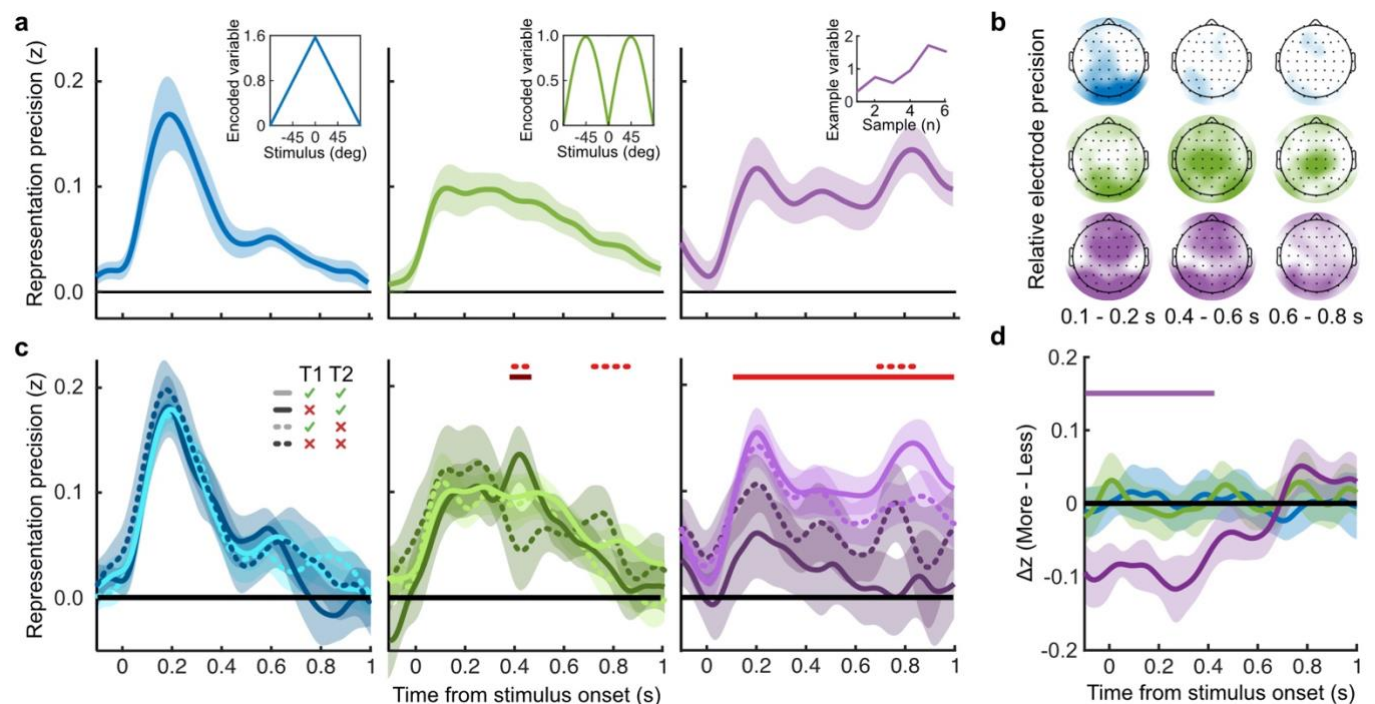

**Figure 5. Representation of decision variables.** **a)** Representation precision (Fischer transformed correlation coefficient,  $z$ ) of stimulus orientation (blue, left), momentary decision update (green, middle), and accumulated decision evidence (purple, right). The encoded variables are shown in the insets (the accumulated evidence is the cumulative sum of the momentary evidence signed by the response, only one example sequence is shown). Shaded regions show 95% between-subject confidence intervals. **b)** Relative electrode representation precision

over three characteristic time windows (100 – 200 ms, left; 400 – 600 ms, middle; and 600 – 800 ms, right). **c)** Representation precision for epochs leading to optimal and suboptimal perceptual (T1) and confidence (T2) responses. Lighter lines show perceptual decisions that match the optimal response, dashed lines show suboptimal confidence ratings. Dashed red horizontal lines show significant interactions between perceptual and confidence suboptimality. The light red horizontal line shows the significant effect of suboptimal perception and the dark red horizontal line shows the significant effect of suboptimal confidence. Shaded regions show 95% within-subject confidence intervals. **d)** Difference in decoding precision between the More and the Less conditions for epochs corresponding to the last four samples of the trial. The purple horizontal line shows the significant difference in decoding of accumulated evidence.

## Neural processes for confidence

The analysis above shows that at certain times there was on average more noise affecting the EEG representation of accumulated evidence on epochs leading to suboptimal behavioural responses. We examined whether this increase in noise was due to a systematic change in the representation that could be functionally related to the inference suboptimalities affecting observers' decision-making and confidence evaluation. Cluster modelling with multivariate Bayesian scan statistics (Neill, 2011; Neill, 2019) was used to isolate contiguous signals in space (electrode location) and time where imprecision in the representation of accumulated evidence was associated with behavioural suboptimalities beyond what could be explained by deviations in measurement noise alone (see **Supplementary Note 6** for further details). For perceptual decision-making, signals were initially clustered over posterior electrodes, becoming dispersed over more anterior electrodes late in the epoch (**Figure 6a**, top). For confidence, we found two co-temporal clusters in posterior and anterior electrodes emerging from 668 ms to 824 ms from stimulus onset (**Figure 6a**, bottom). We combined the signals from the two confidence clusters to estimate the confidence representation of accumulated evidence (**Figure 6b**, dark green bar). We used this representation to estimate the single-sample inference error of the observer, based on the deviation of the effective (noisy) value from the predicted value, given the representation and the true value presented to the observer.

We compared the inference error estimated from the confidence representation to the inference error estimated from the computational model of behaviour. There was a significant correlation with the error estimated from the model of confidence ratings (mean  $z = 0.05$ ,  $t(19) = 5.12$ ,  $p < 0.001$ ), and this correlation was significantly greater than the error estimated from the model of perceptual decisions alone ( $t(19) = 2.62$ ,  $p = 0.017$ ; see **Supplementary Note 7**). This suggests that the noise present in this cluster-wide representation specifically contributes to suboptimal confidence ratings over and above perceptual noise. Moreover, the precision of the confidence representation persisted through the last four samples of the More condition (**Figure 6b**), as expected of a signal that continues to process evidence for confidence after perceptual decision commitment. In contrast, the early posterior representation found to be relevant for perceptual decision-making did show attenuation for the last four samples of the More condition (a repeated measures ANOVA revealed a significant interaction between cluster and condition for decoding precision in the last four samples,  $F(1,19) = 32.00$ ,  $p = 0.001$ , Bonferroni corrected for three comparisons; **Figure 6b**),

and the perceptual representation error was unrelated to suboptimal confidence ratings (in fact the evidence was in favour of the null hypothesis; summed log likelihood ratio = -1176). These results are consistent with dissociable stages of neural processing for confidence evaluation and perceptual decision-making.

Greater error in the confidence representation of accumulated evidence was associated with greater model estimated inference error and suboptimal behavioural confidence evaluations. We examined the sources of the EEG representation error by comparing 'Noise Min' and 'Noise Max' epochs (the top and bottom quartile of epochs sorted by the confidence representation precision). The presented sensory evidence was similar across these epochs (see **Supplementary Note 7**), but the additional noise in the Noise Max epochs pushes the represented evidence further from the mean, and should therefore correspond to a greater absolute normalised signal. We estimated the sources of activity in the Noise Min and Noise Max epochs using a template brain (**Figure 6c**; see **Methods**) and tested for differences in the rectified normalised current density in ROIs defined based on the previous literature (**Figure 6d**; Graziano, Parra, and Sigman, 2015; German and Philiastides, 2018; Herding et al., 2019, see **Supplementary Note 9**). As expected, Noise Max epochs showed a greater increase in current density power over time. Significant differences first emerged in the Superior Parietal cortex (**Figure 6e**; 276 - 304 ms;  $t_{avg}(19) = 2.37$ ,  $p_{cluster} = 0.016$ , re-emerging at 596 - 748 ms;  $t_{avg}(19) = 2.53$ ,  $p_{cluster} = 0.016$ ; and 912 ms;  $t_{avg}(19) = 2.50$ ,  $p_{cluster} = 0.014$ ), and then in the Orbitofrontal cortex (OFC; 516 - 556 ms;  $t_{avg}(19) = 2.30$ ,  $p_{cluster} = 0.022$ , re-emerging at 660 - 772 ms;  $t_{avg}(19) = 2.79$ ,  $p_{cluster} = 0.032$ , and 824 - 1000 ms;  $t_{avg}(19) = 2.60$ ,  $p_{cluster} = 0.022$ ). No differences in the rostral Middle Frontal cortex nor Lateral Occipital cortex survived cluster correction.

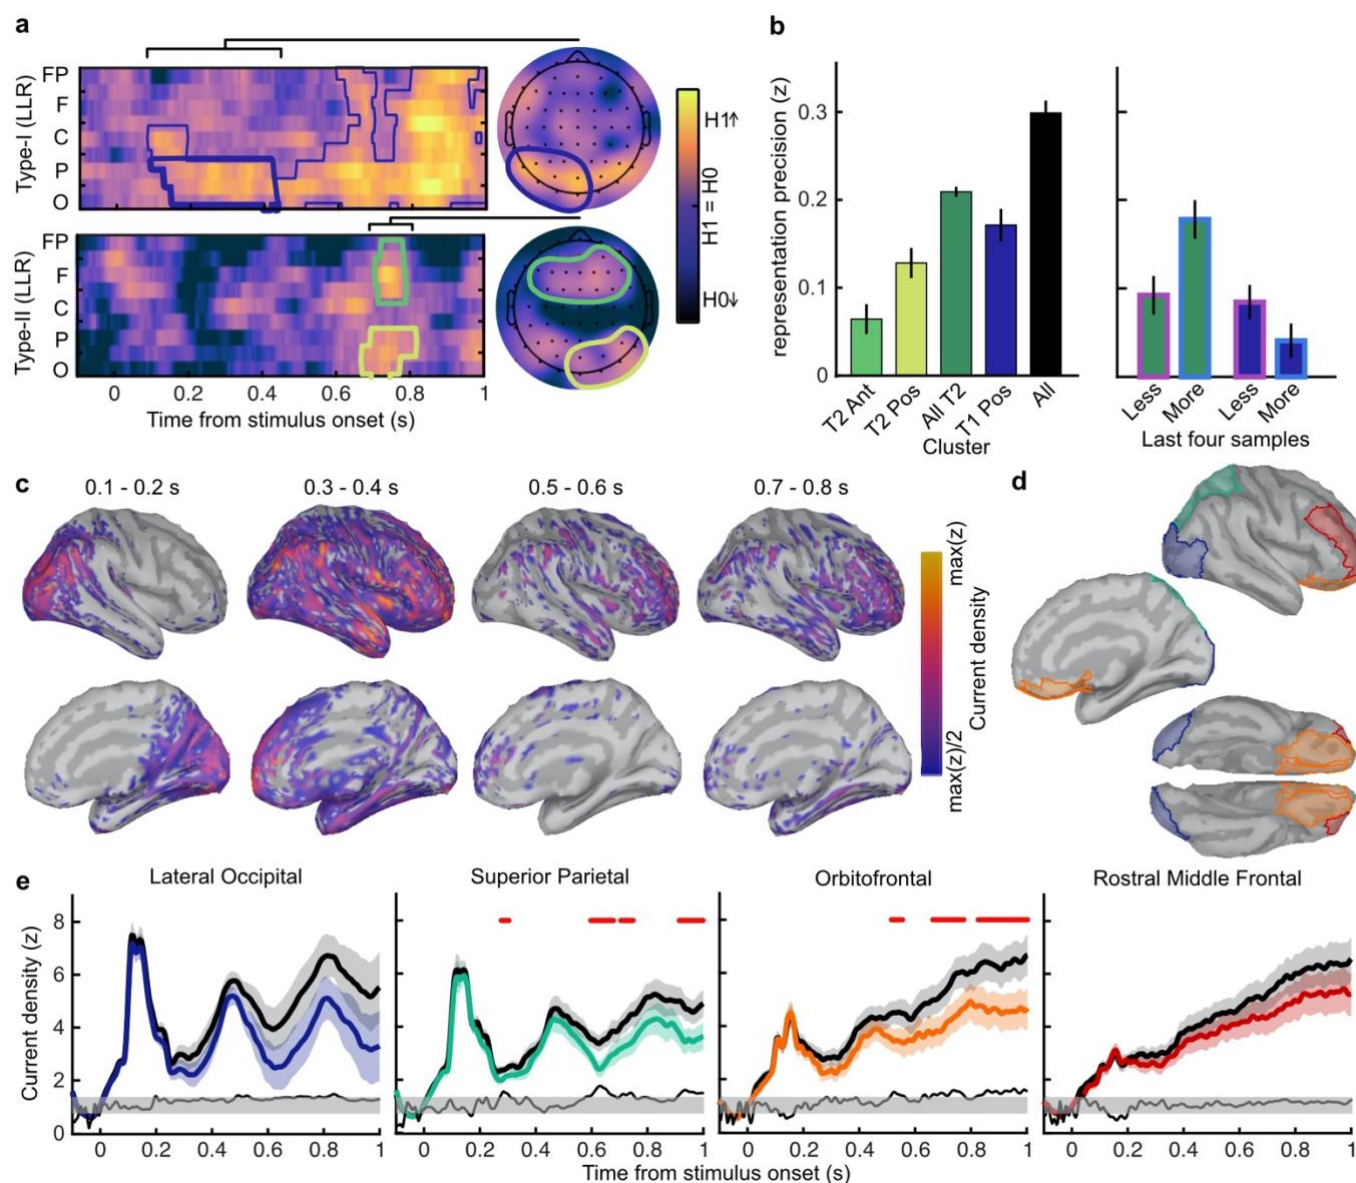

**Figure 6. Clusters of behaviourally relevant representations and their sources.** **a)** Log likelihood ratio (LLR) of the data given the hypothesis that decoding precision varies with behavioural suboptimalities, against the null hypothesis that decoding precision varies only with measurement noise. Perceptual (Type-I) behaviour is shown on top and confidence (Type-II) behaviour is shown on the bottom. Clusters where the log posterior odds ratio outweighed the prior are circled, only the bold area of the perceptual cluster was further analysed. Time series (left) show the maximum LLR of electrodes laterally, with frontal polar electrodes at the top descending to occipital electrodes at the bottom. Scalp maps (right) show the summed LLR over the indicated time windows. **b)** Left: representation precision (z) training and testing on signals within the clusters. Colours correspond to the circles in a), with the dark green bar showing the combined decoding precision of the anterior and posterior confidence clusters, and the black bar showing the combined representation precision of all clusters. Right: Representation precision of the last four samples in the Less and the More conditions for the combined confidence representation and the perceptual representation. Error bars show 95% within-subject confidence intervals. **c)** Average rectified normalised current density in Noise Min epochs for the corresponding time windows, filtered above the half-maximum amplitude. **d)** ROIs (defined by mindBoggle coordinates; Klein et al., 2017): Lateral Occipital cortex (blue); Superior Parietal cortex (green); Orbitofrontal cortex (orange);



*and Rostral Middle Frontal cortex (red). e) ROI time series for Noise Max (black) and Noise Min (coloured) epochs, taking the average rectified normalised current density (z) across participants. Shaded regions show 95% within-subject confidence intervals, red horizontal lines indicate cluster corrected significant differences. Standardised within-subject differences are traced above the x-axis, with the shaded region marking  $z = 0$  to  $z = 1.96$  (95% confidence).*

## Discussion

We examined the dynamic neural signals associated with suboptimal accumulation of evidence for evaluating confidence in perceptual decisions. Observers were required to integrate evidence over multiple samples provided by a sequence of visual stimuli. When observers were unable to control the amount of evidence they were exposed to, they employed a covert decision bound, committing to decisions when they had enough evidence, even if stimulus presentation continued. We had previously shown evidence for this premature decision commitment based on behaviour and computational modelling (Balsdon, Wyart and Mamassian, 2020). We replicated these results here, and further examined the neural signatures of covert decision making. We found that the distribution of spectral power associated with preparing a motor response in the Free task (where the response is entered as soon as the decision is made) could be used to accurately predict responses in the More condition of the Replay task over 1 s prior to when the response was entered, and with significantly greater sensitivity than in the Less condition (when observers were unlikely to have committed to a decision early). This suggests that covert decisions could trigger the motor preparation for pressing the response key. Moreover, the strength of the eventual motor response signal could be predicted by earlier decision evidence in the More condition, as if observers are maintaining some representation of the decision evidence whilst waiting to press the response key.

Based on the evoked representation of accumulated evidence, perceptual decision accuracy relied on a flow of information processing from early Occipital and Parietal signals, which then spread through to anterior electrodes. When observers committed to perceptual decisions prematurely, only the early part of the representation of accumulated evidence was attenuated. This selective dampening of the representation of accumulated evidence following premature decision commitment delineates which computations are devoted solely to the perceptual decision process, and which computations reflect the input to the decision process: The representations of stimulus orientation and decision update (Wyart et al., 2012; Wyart et al., 2015; Weiss et al., 2019), which are necessary input for the perceptual decision, did not substantially change after committing to a perceptual decision. This initial perceptual processing stage likely remained important for the continued accumulation of evidence for evaluating confidence (even after the completion of perceptual decision processes), though it could also be that these processes are automatically triggered by stimulus onset irrespective of whether the evidence is being accumulated for decision-making.

Confidence should increase with increasing evidence for the perceptual decision. It is therefore unsurprising that the neural correlates of confidence magnitude have found similar EEG markers as those related to the accumulation of the underlying perceptual decision evidence: the P300 (Gherman and Philiastides, 2015;

Desender et al., 2016; Desender et al., 2019; Zakrzewski et al., 2019; Rausch et al., 2020); and Central Parietal Positivity (CPP; Boldt et al., 2019; Herding et al., 2019, indeed we show a similar effect in **Figure 3**). The analysis presented in this manuscript targeted confidence precision rather than confidence magnitude, by assessing confidence relative to an optimal observer who gives high confidence ratings on trials where the evidence in favour of the perceptual choice is greater than the median across trials. We isolated part of the representation of accumulated evidence where greater error in the representation was followed by suboptimal confidence ratings, and showed that this was also associated with greater error estimated by the computational model fit to describe confidence behaviour.

The precision of the confidence representation was found to be disrupted by noise localised to the Superior Parietal and Orbitofrontal cortices. This is not at odds with the previous literature: The difference in Superior Parietal cortex could be linked with findings from electrophysiology that suggest that confidence is based on information coded in Parietal cortex, where the underlying perceptual decision evidence is integrated (Kiani et al., 2009; Rutishauser et al., 2018; though at least a subset of these neurons reflect bounded accumulation, which is in contrast with the continued confidence accumulation described in this experiment; Kiani, Hanks, and Shadlen, 2007). Early electrophysiological investigation into the function of the Orbitofrontal cortex revealed neural coding associated with stimulus value (Thorpe, Rolls, and Maddison, 1983), which has since been linked with a confidence-modulated signal of outcome-expectation (Kepecs et al., 2008; and in human fMRI; Rolls, Grabenhorst, and Deco, 2010) and recently, shown to be domain-general (single OFC neurons were associated with confidence in both olfactory and auditory tasks; Masset et al., 2020). The source localisation analysis therefore connects previous findings, indicating confidence feeds off an evidence accumulation process, culminating in higher-order brain areas that appear to function for guiding outcome-driven behaviour based on decision certainty.

These neural signatures of confidence evidence encoding were present throughout the process of making a perceptual decision. This is in line with more recent evidence suggesting that confidence could be computed online, alongside perceptual evidence accumulation (Zizlsperger et al., 2014; Gherman and Piliastides, 2015; Balsdon et al., 2020), as opposed to assessing the evidence in favour of the perceptual decision only after committing to that decision. Computational model comparison supported this interpretation, showing the best description of confidence behaviour was an accumulation process that was partially dissociable from perceptual evidence accumulation (**Supplementary Note 1**; replicating our previous analysis, Balsdon et al., 2020). This partial dissociation mediates the ongoing debate between single-channel (for example, Maniscalco and Lau, 2016) and dual-channel (for example, Charles, King, and Deheane 2014) models, as it constrains confidence by perceptual suboptimalities, at the same time as allowing additional processing to independently shape confidence. The combination of this partial dissociation and online monitoring could allow for metacognitive control of perceptual evidence accumulation, to flexibly balance perceptual accuracy against efficiency by bounding perceptual evidence accumulation according to contemporaneous confidence.

Using this protocol, we were able to delineate two distinct representations of accumulated evidence which correspond to perceptual decision-making and confidence evaluations. These neural representations were

partially dissociable in that the perceptual representation neglected additional evidence following premature decision commitment whilst the confidence representation continued to track the updated evidence independently of decision commitment. This partial dissociation validates the predictions of the computational model and provides a framework for the cognitive architecture underlying the distinction between perception and confidence. That the neural resources involved in the confidence representation can be recruited independently of perceptual processes implies a specific neural circuit for the computation of confidence, a necessary feature of a general metacognitive mechanism flexibly employed to monitor the validity of any cognitive process.

## Methods

### Participants

A total of 20 participants were recruited from the local cognitive science mailing list (RISC) and by word of mouth. No participant met the pre-registered ([https://osf.io/346pe/?view\\_only=ddbc092996f34438964cf45a239498bb](https://osf.io/346pe/?view_only=ddbc092996f34438964cf45a239498bb)) exclusion criteria of chance-level performance or excessive EEG noise. Written informed consent was provided prior to commencing the experiment. Participants were required to have normal or corrected to normal vision. Ethical approval was granted by the INSERM ethics committee (ID RCB: 2017-A01778-45 Protocol C15-98).

### Materials

Stimuli were presented on a 24" BenQ LCD monitor running at 60 Hz with resolution 1920x1080 pixels and mean luminance 45 cd/m<sup>2</sup>. Stimulus generation and presentation was controlled by MATLAB (Mathworks) and the Psychophysics toolbox (Brainard, 1997; Pelli, 1997; Kleiner et al., 2007), run on a Dell Precision M4800 Laptop. Observers viewed the monitor from a distance of 57 cm, with their head supported by a chin rest. EEG data were collected using a 64-electrode BioSemi ActiveTwo system, run on a dedicated mac laptop (Apple Inc.), with a sample rate of 512 Hz. Data were recorded within a shielded room.

### Stimuli

Stimuli were oriented Gabor patches displayed at 70% contrast, subtending 4 dva and with spatial frequency 2 cyc/deg. On each trial a sequence of stimuli was presented, at an average rate of 3 Hz, with the stimulus presented at full 70% contrast for a variable duration between 50 and 83 ms, with a sudden onset, followed by an offset ramp over two flips, where the stimulus contrast decreased by 50% and 75% before complete offset. Stimulus onset timing was jittered within the stimulus presentation interval such that the timing of stimulus onset was irregular but with at least 216 ms between stimuli. These timings and stimulus examples are shown in **Figure 1a**.

On each trial the orientations of the presented Gabors were drawn from one of two circular Gaussian (Von Mises) distributions centred on +/- 45° from vertical (henceforth referred to as the 'orange' and 'blue' distributions respectively), with concentration  $\kappa = 0.5$  (shown in **Figure 1d**). Stimuli were displayed within an annular 'colour-guide' where the colour of the annulus corresponds to the probability of the orientation under each distribution, using the red and blue RGB channels to represent the probabilities of each

orientation under each distribution. Stimuli were presented in the centre of the screen, with a black central fixation point to guide observers' gaze.

## Procedure

The task was a modified version of the weather prediction task (Knowlton et al., 1996; Drugowitsch et al., 2016). Throughout the experiment, the observer's perceptual task was to categorise which distribution the stimulus orientations were sampled from. They were instructed to press the 'd' key with their left hand (of a standard querty keyboard) for the blue distribution and the 'k' key with their right hand for the orange distribution. There were two variants of the task: The Free task and the Replay task. The trials were composed of three repetitions of 100 predefined sequences of up to 40 samples (50 trials from each distribution) for each observer (300 trials per task).

In the 'Free' task, observers were continually shown samples (up to 40) until they entered their response. They were instructed to enter their response as soon as they 'feel ready' to make a decision, with emphasis on both accuracy (they should make their decision when they feel they have a good chance of being correct) and on time (they shouldn't take too long to complete each trial). A graphical description of this task is shown in **Figure 1b**.

After completing the Free task, observers then completed the Replay task. In this task they were shown a specific number of samples and could only enter their response after the sequence finished, signalled by the fixation point turning red. The number of samples was determined based on the number observers chose to respond to in the Free task. There were three intermixed conditions: In the Less condition observers were shown two fewer samples than the minimum they had chosen to respond to on that predefined sequence in the Free task; In the Same condition observers were shown the median number of samples from that predefined sequence; in the More condition observers were shown four additional samples compared to the maximum number they chose to respond to on that sequence in the Free task. After entering their perceptual (Type-I) response, observers were cued to give a confidence rating (Type-II decision). The confidence rating was given on a 4-point scale where 1 represents very low confidence that the perceptual decision was correct, and 4, certainty that the perceptual decision was correct. The rating was entered by pressing the 'space bar' when a presented dial reached the desired rating. The dial was composed of a black line which was rotated clockwise to each of 4 equidistant angles (marked 1 - 4) around a half circle, at a rate of 1.33 Hz. The dial started at a random confidence level on each trial and continued updating until a rating was chosen. A graphical description of this task is shown in **Figure 1c**.

Prior to commencing the experimental trials, participants were given the opportunity to practice the experiment and ask questions. They first performed 20 trials of a fixed number of samples with only the perceptual decision, with feedback after each response as to the true category. They then practiced the Replay task with the confidence rating (and an arbitrary number of samples). Finally, they practiced the Free task, before commencing the experiment with the Free task.



## 478 Analysis

## 479 Behaviour

480 Perceptual (Type-I) decisions were evaluated relative to the category the orientations were actually drawn  
 481 from. Performance is presented as proportion correct, whilst statistical analyses were performed on  
 482 sensitivity ( $d'$ ). Confidence was evaluated relative to an optimal observer who gives high confidence when  
 483 the log-likelihood of the chosen category, based on the presented orientations, is above the median across  
 484 trials, and low confidence on trials with less than the median log-likelihood. More broadly, confidence should  
 485 increase with increasing evidence in favour of the perceptual decision, see **Supplementary Note 3**.

## 486 Computational modelling

487 Computational modelling followed the same procedure as Balsdon, Wyart, and Mamassian (2020). The  
 488 model parametrically describes suboptimalities relative to the Bayesian optimal observer. The Bayesian  
 489 optimal observer knows the category means,  $\mu_1 = -\frac{\pi}{4}$ ,  $\mu_2 = \frac{\pi}{4}$ , and the concentration,  $\kappa = 0.5$ , and takes the  
 490 probability of the orientation  $\theta_n$  (at sample  $n$ ) given each category  $\psi$  ( $\psi = 1$  or  $\psi = 2$ ):

$$p(\theta_n | \psi) = \frac{e^{\kappa \cos(2(\theta_n - \mu_\psi))}}{\pi I_0(\kappa)} \quad (1)$$

491 Where  $I_0(\cdot)$  is the modified Bessel function of order 0. The optimal observer then chooses the category  
 492  $\psi$  with the greatest posterior probability over all samples for that trial,  $T$  ( $T$  varies from trial to trial). Given a  
 493 uniform category prior,  $p(\psi) \propto \frac{1}{2}$ , and perfect anticorrelation in  $p(\theta_n | \psi)$  over the categories, the log  
 494 posterior is proportional to the sum of the difference in the log-likelihood for each category ( $\ell_n = \ell_{n,1} -$   
 495  $\ell_{n,2}$ ):

$$z = \sum_{n=1}^T \ell_n \quad (2)$$

496 Where:

$$\ell_{n,\psi} = \log p(\theta_n | \psi) = \kappa \cos(2(\theta_n - \mu_\psi)) + \text{const.} \quad (3)$$

497 Such that the Bayesian optimal decision is 1 if  $z > 0$  and 2 if  $z \leq 0$ .

498 The suboptimal observer suffers inaccuracies in the representation of each evidence sample, captured by  
 499 additive independent identically distributed (i.i.d) noise,  $\varepsilon_n$ . The noise is Gaussian distributed with zero  
 500 mean, and the degree of variability parameterised by  $\sigma$ , the standard deviation:

$$\varepsilon_n \sim N(0, \sigma^2) \quad (4)$$

501 The evidence over samples is also imperfectly accumulated, incurring primacy or recency biases  
 502 parameterised by  $\alpha$ , the weight on the current accumulated evidence compared to the new sample ( $\alpha > 1$   
 503 creates a primacy effect). By the end of the trial, the weight on each sample  $n$  is equal to:

$$v_n = \alpha^{T-n} \quad (5)$$

Where  $T$  is the eventual total samples on that trial and  $n \in [1, T]$ .

In the Free task the observer responds when accumulated evidence reaches a bound,  $\Lambda$ . The optimal observer sets a constant bound on proportion correct over sequence length, which is an exponential function on the average evidence over the samples accumulated. The human observer can set the scale,  $b$ , and the rate of decline,  $\lambda$ , of the bound suboptimally, resulting in:

$$\Lambda_{n+} = n \times \left( a + b e^{-\frac{n}{\lambda}} \right) \quad (6)$$

for the positive decision bound (the negative bound,  $\Lambda_{n-} = -\Lambda_{n+}$ ). The likelihood  $f(n)$  of responding at sample  $n$  was estimated by computing the frequencies, over 1000 samples from  $\varepsilon_n$  (Monte Carlo simulation), of first times where the following inequality is verified:

$$\left| \sum_{n=1}^N (\ell_n + \varepsilon_n) \cdot v_n \right| > \Lambda_n \quad (7)$$

The response time, relative to reaching the decision bound, is delayed by non-decision time for executing the motor response, which is described by a Gaussian distribution of mean,  $\mu_U$ , and variance,  $\sigma_U^2$ .

## Model fitting

Parameters were optimised to minimise the negative log-likelihood of the observer making response  $r$  on sample  $n$  on each trial for each participant using Bayesian Adaptive Direct Search (Acerbi and Ma, 2017). The log-likelihoods were estimated using Monte Carlo Simulation, with the sensitivity of this approach being addressed in previous work (Balsdon et al., 2020). The full model was simplified using a knock-out procedure based on Bayesian Model Selection (Rigoux et al., 2014) to fix the bias (exceedance probability = 0.93) and lapse (exceedance probability >0.99) parameters (not described above, see **Supplementary Note 1**).

In the Replay task, confidence ratings were fit using the same model described above, but with additional criteria determining confidence ratings, described by three bounds on the confidence evidence, parameterised in the same manner as the decision bound. These models were then used to simulate the internal evidence of each observer from sample to sample, and the error compared to the ideal evidence (uncorrupted by suboptimalities, see **Supplementary Note 2**).

## EEG pre-processing

EEG data were pre-processed using the PREP processing pipeline (Bigdely-Shamlo, et al., 2015), implemented in EEGLab (v2019.0, Delorme & Makeig, 2004) in MATLAB (R2019a, Mathworks). This includes line noise removal (notch filter at 50 Hz and harmonics) and re-referencing (robust average re-reference on data detrended at 1 Hz). The data were then filtered to frequencies between 0.5 and 80 Hz, and down-sampled to 256 Hz. Large epochs were taken locked to each stimulus (-500 to 1500 ms) and each response (-5000 to 1500 ms). Independent Components Analysis was used to remove artefacts caused by blinks and

excessive muscle movement identified using labels with a probability greater than 0.35 from the ICLabel project classifier (Swartz Centre for Computational Neuroscience).

## Classical analyses

We present several ‘classical’ comparisons, examining the effect of confidence on EEG amplitude (microvolts). In **Figure 3**, we show Central Parietal Positivity (CPP; O’Connell et al., 2012; average amplitude of electrodes CP1, CP2, and CPz over response locked epochs), and the Lateralised Readiness Potential (LRP; difference in microvolts between the average of electrodes [C1, C3], and [C2, C4], signed by response hand; Deecke et al., 1976). In all cases, the group average within condition over the 100 ms prior to the first stimulus of each trial was used as a baseline, the data were otherwise unfiltered except for the pre-processing.

## Response classification analysis

The power spectrum across frequency tapers from 1 to 64 Hz with 25% spectral smoothing was resolved using wavelet convolution implemented in FieldTrip (Oostenveld et al., 2011). The epochs were then clipped at -3 to 1 s around the time of entering the perceptual response. Linear discriminant analysis was performed to classify perceptual responses, using 10-fold cross validation, separately on each taper at each time-point. An analysis of the frequencies contributing to accurate classification at the time of the response revealed significant contributions from 8 to 26 Hz (**Supplementary Note 4**). We therefore continued by using the power averaged across these frequency bands to train and test the classifier. Classifier accuracy was assessed using the area under the receiver operating characteristic curve (AUC). At the single-trial level, the probability of the response based on the classifier was computed from the relative normalised Euclidean distance of the trial features from the response category means in classifier decision space.

## Encoding Variable Regression

We used a linear regression analysis to examine the EEG correlates of different aspects of the decision evidence (encoding variables) in epochs locked to stimulus onset. Regularised ridge regression (ridge  $\lambda = 1$ ) was used to predict the encoding variables based on EEG data, over 10-fold cross validation. The precision of the representation of each encoding variable was computed within each observer by taking the Fisher transform of the correlation coefficient (Pearson’s  $r$ ) between the encoded variable and predicted variable. To maximise representation precision, the data were bandpass filtered (1 – 8 Hz) and decomposed into real and imaginary parts using a Hilbert Transform (**Supplementary Note 5**). For each time point, the data from all electrodes were used to predict the encoded variable. The temporal generalisation of decoding weights was examined by training at one time point and testing at another. The contribution of information from signals at each electrode was examined by training and testing on the signals at each electrode at each time point (further details in **Supplementary Note 5**).

Behaviourally relevant signals were isolated by comparing representation precision at each time point and electrode for epochs leading to optimal and suboptimal perceptual and confidence responses. Cluster modelling was used to isolate contiguous signals where the log posterior odds were in favour of the

alternative hypothesis that representation precision was affected by inference noise beyond what could be explained by measurement noise alone (**Supplementary Note 6**). New regression weights were then calculated on signals from the entire cluster and representation errors calculated as the difference of the predicted variable from the expected value given the representation precision.

## Source Localisation

Identifying the clusters of signals associated with confidence processes offers relatively poor spatial and temporal (given the bandpass filter; de Cheveigné, and Nelken, 2019) resolution for identifying the source of the suboptimalities affecting confidence ratings. Source localisation was therefore performed, using Brainstorm (Tadel et al., 2011). The forward model was computed using OpenMEEG (Gramfort et al., 2010; Kybic et al., 2005) and the ICBM152 anatomy (Fonov et al., 2011; 2009). Two conditions were compared, Noise Min and Noise Max, which corresponded to quartiles of epochs sorted by representation error in the confidence clusters (see **Supplementary Note 7** for more details). Cortical current source density was estimated from the average epochs using orientation-constrained minimum norm imaging (Baillet, Mosher, and Leahy, 2001). ROIs in the Lateral Occipital, Superior Parietal, Rostral Middle Frontal (including dlPFC), Medial Orbitofrontal, and rostral Anterior Cingulate Cortex, were defined using MindBoggle coordinates (Klein et al., 2017). Statistical comparisons were performed on the bilateral ROI time series (using cluster correction and a minimum duration of 20 ms), computed over separate conditions on rectified normalised subject averages (low-pass filtered at 40 Hz).



## References

- Acerbi, L., & Ma, W. J. Practical Bayesian optimization for model fitting with Bayesian adaptive direct search. In *Advances in Neural Information Processing Systems*, December 2017; 1836-1846
- Bahrami, B., Olsen, K., Bang, D., Roepstorff, A., Rees, G., & Frith, C. What failure in collective decision-making tells us about metacognition. *Philosophical Transactions of the Royal Society B: Biological Sciences*, 2012; **367**(1594), 1350-1365.
- Baillet, S., Mosher, J. C., & Leahy, R. M. Electromagnetic brain mapping. *IEEE Signal Processing Magazine*, 2001; **18**(6), 14-30.
- Balsdon, T., Wyart, V., & Mamassian, P. Confidence controls perceptual evidence accumulation. *Nature Communications*, 2020; **11**(1), 1-11
- Bang, J. W., Shekhar, M., & Rahnev, D. Sensory noise increases metacognitive efficiency. *Journal of Experimental Psychology: General*, 2019; **148**(3), 437.
- Baranski, J. V., & Petrusic, W. M. The calibration and resolution of confidence in perceptual judgments. *Perception & Psychophysics*, 1994; **55**(4), 412-428.
- Bigdely-Shamlo, N., Mullen, T., Kothe, C., Su, K. M., & Robbins, K. A. The PREP pipeline: standardized preprocessing for large-scale EEG analysis. *Frontiers in Neuroinformatics*, 2015; **9**, 16
- Boldt, A., Schiffer, A. M., Waszak, F., & Yeung, N. Confidence predictions affect performance confidence and neural preparation in perceptual decision making. *Scientific Reports*, 2019; **9**(1), 1-17.
- Brainard, D. H. The psychophysics toolbox. *Spatial Vision*, 1997; **10**(4), 433-436.
- Charles, L., King, J. R., & Dehaene, S. Decoding the dynamics of action, intention, and error detection for conscious and subliminal stimuli. *Journal of Neuroscience*, 2014; **34**(4), 1158-1170.
- de Cheveigné, A., & Nelken, I. Filters: when, why, and how (not) to use them. *Neuron*, 2019; **102**(2), 280-293.
- Deecke, L., Grozinger, B., & Kornhuber, H. H. Voluntary finger movement in man: Cerebral potentials and theory. *Biological Cybernetics*, 1976; **23**, 99-119.
- Delorme, A., & Makeig, S. EEGLAB: an open source toolbox for analysis of single-trial EEG dynamics including independent component analysis. *Journal of Neuroscience Methods*, 2004; **134**(1), 9-21.
- Desender, K., Van Opstal, F., Hughes, G., & Van den Bussche, E. The temporal dynamics of metacognition: Dissociating task-related activity from later metacognitive processes. *Neuropsychologia*, 2016; **82**, 54-64.
- Desender, K., Murphy, P., Boldt, A., Verguts, T., & Yeung, N. A postdecisional neural marker of confidence predicts Information-Seeking in Decision-Making. *Journal of Neuroscience*, 2019; **39**(17), 3309-3319.
- Drugowitsch, J., Wyart, V., Devauchelle, A. D., & Koechlin, E. Computational precision of mental inference as critical source of human choice suboptimality. *Neuron*, 2016; **92**, 1398-1411
- Fleming, S. M., & Daw, N. D. Self-evaluation of decision-making: A general Bayesian framework for metacognitive computation. *Psychological Review*, 2017; **124**(1), 91.
- Fonov VS, Evans AC, McKinstry RC, Almlí CR, Collins DL. Unbiased nonlinear average age-appropriate brain templates from birth to adulthood. *NeuroImage*, 2009; **47**, S102.
- Fonov, V., Evans, A. C., Botteron, K., Almlí, C. R., McKinstry, R. C., Collins, D. L., & Brain Development

Cooperative Group. Unbiased average age-appropriate atlases for pediatric studies. *Neuroimage*, 2011; **54**(1), 313-327.

Frith, C. D. The role of metacognition in human social interactions. *Philosophical Transactions of the Royal Society B: Biological Sciences*, 2012; **367**(1599), 2213-2223.

Gherman, S., & Philiastides, M. G. Human VMPFC encodes early signatures of confidence in perceptual decisions. *eLife*, 2018; **7**, e38293.

Gherman, S., & Philiastides, M. G. Neural representations of confidence emerge from the process of decision formation during perceptual choices. *NeuroImage*, 2015; **106**, 134-143.

Gramfort, A., Papadopoulos, T., Olivi, E., & Clerc, M. OpenMEEG: opensource software for quasistatic bioelectromagnetics. *Biomedical Engineering Online*, 2010; **9**(1), 45.

Graziano, M., Parra, L. C., & Sigman, M. Neural correlates of perceived confidence in a partial report paradigm. *Journal of Cognitive Neuroscience*, 2015; **27**(6), 1090-1103.

Helmholtz, H.L.F.v. *Treatise on Physiological Optics*, Thoemmes Press 1856.

Herding, J., Ludwig, S., von Lautz, A., Spitzer, B., & Blankenburg, F. Centro-parietal EEG potentials index subjective evidence and confidence during perceptual decision making. *NeuroImage*, 2019; **201**, 116011.

Kepecs, A., Uchida, N., Zariwala, H. A., & Mainen, Z. F. Neural correlates, computation and behavioural impact of decision confidence. *Nature*, 2008; **455**, 227-231.

Kiani, R., & Shadlen, M. N. Representation of confidence associated with a decision by neurons in the parietal cortex. *Science*, 2009; **324**, 759-764.

Kiani, R., Corthell, L., & Shadlen, M. N. Choice certainty is informed by both evidence and decision time. *Neuron*, 2014; **84**(6), 1329-1342.

Kiani, R., Hanks, T. D., & Shadlen, M. N. Bounded integration in parietal cortex underlies decisions even when viewing duration is dictated by the environment. *Journal of Neuroscience*, 2008; **28**(12), 3017-3029.

Klein, A., Ghosh, S. S., Bao, F. S., Giard, J., Häme, Y., Stavsky, E., ... & Keshavan, A. Mindboggling morphometry of human brains. *PLoS Computational Biology*, 2017; **13**(2), e1005350.

Kleiner, M., Brainard, D., & Pelli, D. What's new in Psychtoolbox-3? 2007.

Knowlton, B. J., Mangels, J. A., & Squire, L. R. A neostriatal habit learning system in humans. *Science*, 1996; **273**(5280), 1399-1402.

Kybic, J., Clerc, M., Abboud, T., Faugeras, O., Keriven, R., & Papadopoulos, T. A common formalism for the integral formulations of the forward EEG problem. *IEEE Transactions on Medical Imaging*, 2005; **24**(1), 12-28.

Maniscalco, B., & Lau, H. The signal processing architecture underlying subjective reports of sensory awareness. *Neuroscience of Consciousness*, 2016; **1**.

Masset, P., Ott, T., Lak, A., Hirokawa, J., & Kepecs, A. Behavior- and modality-general representation of confidence in orbitofrontal cortex. *Cell*, 2020; **182**(1), 112-126.

Mazancieux, A., Fleming, S., Souchay, C., & Moulin, C. Retrospective confidence judgments across tasks: domain-general processes underlying metacognitive accuracy. *BioRxiv* 2018.

Moreno-Bote, R. Decision confidence and uncertainty in diffusion models with partially correlated neuronal

- integrators. *Neural Computation*, 2010; **22**, 1786–1811.
- Neill, D. B. Fast Bayesian scan statistics for multivariate event detection and visualization. *Statistics in Medicine*, 2011; **30**(5), 455-469.
- Neill, D. B. Bayesian Scan Statistics. In: Glaz J., Koutras M. (eds) *Handbook of Scan Statistics*. Springer, New York, NY. 2019.
- O'Connell, R. G., Dockree, P. M., & Kelly, S. P. A supramodal accumulation-to-bound signal that determines perceptual decisions in humans. *Nature Neuroscience*, 2012; **15**(12), 1729.
- Oostenveld, R., Fries, P., Maris, E., & Schoffelen, J. M. FieldTrip: open source software for advanced analysis of MEG, EEG, and invasive electrophysiological data. *Computational Intelligence and Neuroscience*, 2011.
- Pelli, D. G. The VideoToolbox software for visual psychophysics: Transforming numbers into movies. *Spatial Vision*, 1997; **10**, 437-442.
- Pleskac, T. J., & Busemeyer, J. R. Two-stage dynamic signal detection: a theory of choice, decision time, and confidence. *Psychological Review*, 2010; **117**(3), 864.
- Pollack, I., & Decker, L. R. Confidence ratings, message reception, and the receiver operating characteristic. *The Journal of the Acoustical Society of America*, 1958; **30**(4), 286-292.
- Ratcliff, R. A theory of memory retrieval. *Psychological Review*, 1987; **85**(2), 59.
- Rausch, M., Zehetleitner, M., Steinhäuser, M., & Maier, M. E. Cognitive modelling reveals distinct electrophysiological markers of decision confidence and error monitoring. *NeuroImage*, 2020; **218**, 116963.
- Rigoux, L., Stephan, K.E., Friston, K.J. & Daunizeau, J. Bayesian Model Selection for Group Studies Revisited. *NeuroImage* 2014; **84**, 971-85.
- Rolls, E. T., Grabenhorst, F., & Deco, G. Choice, difficulty, and confidence in the brain. *NeuroImage*, 2010; **53**(2), 694-706.
- Rutishauser, U., Aflalo, T., Rosario, E. R., Pouratian, N., & Andersen, R. A. Single-neuron representation of memory strength and recognition confidence in left human posterior parietal cortex. *Neuron*, 2018; **97**(1), 209-220.
- Shekhar, M., & Rahnev, D. Sources of Metacognitive Inefficiency. *Trends in Cognitive Sciences*.
- Tadel, F., Baillet, S., Mosher, J. C., Pantazis, D., & Leahy, R. M. Brainstorm: a user-friendly application for MEG/EEG analysis. *Computational Intelligence and Neuroscience*, 2011.
- Thorpe, S. J., Rolls, E. T., & Maddison, S. The orbitofrontal cortex: neuronal activity in the behaving monkey. *Experimental Brain Research*, 1983; **49**(1), 93-115.
- Veenman, M. V., Wilhelm, P., & Beishuizen, J. J. The relation between intellectual and metacognitive skills from a developmental perspective. *Learning and Instruction*, 2004; **14**(1), 89-109.
- Vickers, D. Evidence for an accumulator model of psychophysical discrimination. *Ergonomics*, 1970; **13**(1), 37-58.
- Vickers, D. *Decision processes in visual perception*. New York, NY: Academic Press. 1979.
- Weiss, A., Chambon, V., Drugowitsch, J., & Wyart, V. Interacting with volatile environments stabilizes hidden-state inference and its brain signatures. *bioRxiv*, 2019
- Wyart, V., De Gardelle, V., Scholl, J., & Summerfield, C. Rhythmic fluctuations in evidence accumulation during

decision making in the human brain. *Neuron*, 2012; **76**(4), 847-858.

Wyart, V., Myers, N. E., & Summerfield, C. Neural mechanisms of human perceptual choice under focused and divided attention. *Journal of Neuroscience*, 2015; **35**(8), 3485-3498.

Zakrzewski, A. C., Wisniewski, M. G., Iyer, N., & Simpson, B. D. Confidence tracks sensory-and decision-related ERP dynamics during auditory detection. *Brain and Cognition*, 2019; **129**, 49-58

Zizlsperger, L., Sauvigny, T., Händel, B., & Haarmeier, T. Cortical representations of confidence in a visual perceptual decision. *Nature Communications*, 2014; **5**(1), 1-13.

# 1 Supplementary materials

## 2 Supplementary Note 1

### 3 Computational Model fitting

4 The computational model is described in full in the **Methods** section. Briefly, the model is based on the  
 5 Bayesian optimal observer with full knowledge of the category distributions (means  $\mu_1$  and  $\mu_2$ ,  
 6 concentration  $\kappa$ ), and takes as evidence the difference in the log posterior probability ( $\ell_n$ ) of each category  
 7 given the orientation ( $\theta_n$ )

$$\begin{aligned}\ell_n &= \ell_{n,1} - \ell_{n,2} = \kappa \cos(2(\theta_n - \mu_1)) - \kappa \cos(2(\theta_n - \mu_2)) \\ &= 2 \kappa \sin(\mu_1 - \mu_2) \sin(2\theta_n - \mu_1 - \mu_2) = \sin(2\theta_n)\end{aligned}\tag{1}$$

8 where chosen values ( $\kappa = 0.5$ ,  $\mu_1 = -\pi/4$ , and  $\mu_2 = \pi/4$ ) have been implemented in the last equation.  
 9 Whilst the optimal observer perfectly sums the evidence over each sample, the suboptimal human observer  
 10 accumulates evidence with some temporal integration bias,  $\alpha$  (where  $\alpha > 1$  creates a primacy effect, and  
 11  $\alpha < 1$ , a recency effect), and incurs inference error (noise in the estimate of the true evidence)  
 12 parameterised by  $\sigma$ , the standard deviation of the Gaussian distribution from which each sample of noise,  $\varepsilon_n$ ,  
 13 is drawn from. The human observer may also experience some response bias,  $c$  (the tendency to choose one  
 14 category irrespective of the evidence), and incur lapses (pressing a random key), described by the lapse rate,  
 15  $l$ . The accumulated evidence,  $z$ , up to sample  $n$ , is suboptimally accumulated by

$$z_n = \alpha z_{n-1} + \ell_n + \varepsilon_n\tag{2}$$

16 The observer then chooses category 1 if  $z > c$ , except on a proportion of trials,  $l$ , where the response is  
 17 randomly selected.

18 These four parameters were used to capture the differences in the human observers' responses (category  
 19 choice and confidence rating) from the optimal observer who perfectly integrates all evidence presented.

20 In the Free task, the model was designed not only to describe the category choice, but at which sample the  
 21 human observer chose to respond. This was achieved via a decision boundary, the nature of which has been  
 22 addressed in previous work (Balsdon, Wyart, and Mamassian, 2020). The boundaries,  $\Lambda_{n+}$  and  $\Lambda_{n-}$ , follow  
 23 an exponential function on the average evidence over samples (which is a constant bound on the probability  
 24 of a correct response), described by three parameters: the minimum,  $a$ , the scale,  $b$ , and the rate of decline,  $\lambda$

$$\Lambda_{n+} = n \times \left( a + b e^{-\frac{n}{\lambda}} \right)\tag{3}$$

25 There is an optimal combination of these parameters to achieve any particular proportion correct across the  
 26 experiment, but the human observer may set their bound suboptimally. In addition, non-decision time (the



time from the last sample integrated to pressing the response key) was described by a Normal distribution with mean  $\mu_U$ , and variance  $\sigma_U^2$ . Giving an additional five parameters for describing when the observer enters their response.

We followed the same procedure as in Balsdon et al., 2020, involving four stages:

1. Reduce the number of free parameters with a knock-out procedure.
2. Compare (covert) Bound and No-bound models of the perceptual decision in the Replay task.
3. Identify any systematic differences in the parameters required to describe the confidence ratings, compared to the perceptual decision, in order to discern the relationship between processes for perceptual decisions and confidence.
4. Apply the same Bound vs. No-bound comparison for describing the confidence ratings.

The average parameter values and fit metrics for Stage 1. are shown in Table 1. According to this analysis, the bias ( $c$ ) and lapse rate ( $l$ ) were fixed. There was some evidence the boundary minimum ( $a$ ) could be fixed in the Replay task, but the preference in the Free task was to leave it free to vary.

| Free Task                   |          |          |       |         |              |      |      |           |       |         |              |
|-----------------------------|----------|----------|-------|---------|--------------|------|------|-----------|-------|---------|--------------|
| Model                       | $\sigma$ | $\alpha$ | $c$   | $\mu_U$ | $\sigma_U^2$ | $a$  | $b$  | $\lambda$ | $l$   | LLH     | $\Sigma BIC$ |
| Full                        | 0.83     | 0.98     | -0.04 | 425     | 0.52         | 0.10 | 6.04 | 1.93      | 0.016 | -734.91 | 30423.01     |
| $\alpha = 1$                | 0.83     | 1.00     | 0.00  | 430     | 0.50         | 0.13 | 6.61 | 2.03      | 0.014 | -734.97 | 30311.59     |
| $c = 0$                     | 0.80     | 0.92     | 0.00  | 452     | 0.54         | 0.11 | 5.28 | 2.01      | 0.017 | -736.86 | 30387.02     |
| $\mu_U = 400$               | 0.76     | 0.94     | 0.00  | 400     | 0.52         | 0.09 | 5.52 | 2.23      | 0.016 | -739.77 | 30503.40     |
| $\sigma_U^2 = 1$            | 0.69     | 0.96     | -0.02 | 435     | 1.00         | 0.10 | 6.34 | 1.97      | 0.015 | -754.18 | 31079.84     |
| $a = 0.1$                   | 0.77     | 0.92     | 0.03  | 417     | 0.52         | 0.10 | 5.78 | 2.20      | 0.016 | -735.48 | 30331.75     |
| $b = 5.5$                   | 0.78     | 0.94     | 0.02  | 410     | 0.64         | 0.13 | 5.50 | 1.79      | 0.013 | -742.18 | 30599.67     |
| $l = 0.001$                 | 0.82     | 0.98     | 0.01  | 400     | 0.48         | 0.10 | 4.77 | 2.22      | 0.001 | -730.66 | 30139.17     |
| $c = 0; l = 0.001$          | 0.79     | 0.94     | 0.00  | 397     | 0.51         | 0.10 | 4.52 | 2.26      | 0.001 | -732.66 | 30104.74     |
| $c = 0; l = 0.001; a = 0.1$ | 0.77     | 0.94     | 0.00  | 403     | 0.52         | 0.10 | 5.37 | 2.13      | 0.001 | -742.42 | 30381.13     |
| Replay Task - no-bound      |          |          |       |         |              |      |      |           |       |         |              |
| Model                       | $\sigma$ | $\alpha$ | $c$   | $\mu_U$ | $\sigma_U^2$ | $a$  | $b$  | $\lambda$ | $l$   | LLH     | $\Sigma BIC$ |
| Full                        | 0.47     | 0.90     | 0.05  | ~       | ~            | ~    | ~    | ~         | 0.012 | -81.13  | 3701.44      |
| $\alpha = 1$                | 0.56     | 1.00     | 0.10  | ~       | ~            | ~    | ~    | ~         | 0.012 | -92.21  | 4030.55      |
| $c = 0$                     | 0.48     | 0.90     | 0.00  | ~       | ~            | ~    | ~    | ~         | 0.009 | -82.73  | 3651.38      |
| $l = 0.001$                 | 0.50     | 0.91     | 0.06  | ~       | ~            | ~    | ~    | ~         | 0.001 | -82.05  | 3624.39      |
| $c = 0; l = 0.001$          | 0.51     | 0.90     | 0.00  | ~       | ~            | ~    | ~    | ~         | 0.001 | -83.64  | 3573.67      |
| Replay task - bound         |          |          |       |         |              |      |      |           |       |         |              |
| Model                       | $\sigma$ | $\alpha$ | $c$   | $\mu_U$ | $\sigma_U^2$ | $a$  | $b$  | $\lambda$ | $l$   | LLH     | $\Sigma BIC$ |
| Full                        | 0.44     | 0.87     | 0.10  | ~       | ~            | 0.17 | 8.68 | 11.71     | 0.012 | -79.81  | 3991.09      |
| $c = 0; l = 0.001$          | 0.48     | 0.88     | 0.00  | ~       | ~            | 0.13 | 8.58 | 15.55     | 0.001 | -82.22  | 3859.24      |
| $c = 0; l = 0.001; a = 0.1$ | 0.48     | 0.88     | 0.00  | ~       | ~            | 0.10 | 8.91 | 15.88     | 0.001 | -82.38  | 3751.55      |

**Table S1. Average parameter values.** Table shows the average values and the sum of BIC across participants. The large difference in the average loglikelihood (LLH) across tasks is due to the fact the Free task model was fit to both when and what observers responded, whereas in the Replay task only the response was fit. Red values show the fixed parameters. Colour code of the BIC column corresponds to the goodness of fit (the greener the better).

To compare the Bound and No-bound models in Stage 2, we used five-fold cross validation. The No-bound model had two free parameters:  $\alpha$  (temporal bias) and  $\sigma$  (inference noise), which were fit to the Same and Less conditions of the Replay task, but tested across all conditions. The Bound model had three free parameters to describe the bound, with the inference noise and temporal bias parameters fixed to those fit to the Same and Less conditions only. In this way, the no-bound model must account for the lack of increased performance in the More condition with the suboptimalities present in the Same and Less conditions, whilst the bound model can limit performance in the More condition in particular by stopping further evidence accumulation. The results of this analysis are presented in the manuscript: the bound significantly improved the fit, mean relative increase in model log-likelihood = 0.048, bootstrapped  $p = 0.001$ , **Figure 2c** in the main text.

Of additional interest is the pattern of parameters fit to each condition separately, when the model attempts to explain behaviour without a bound. There was little difference in parameters fit to the Same and Less conditions (mean  $\sigma_S = 0.48$ ,  $\sigma_L = 0.44$ ,  $Z(19) = -1.46$ ,  $p = 0.15$ ;  $\alpha_S = 0.86$ ,  $\alpha_L = 0.78$ ,  $Z(19) = 1.38$ ,  $p = 0.17$ ). The inference noise fit to the More condition significantly increased from the Less condition ( $\sigma_M = 0.55$ ,  $Z(19) = -2.61$ ,  $p_{\text{bonf}^4} = 0.036$ ), but there was significantly reduced temporal integration bias ( $\alpha_M = 0.93$ ,  $Z(19) = -2.50$ ,  $p_{\text{bonf}^4} = 0.0496$ ) suggesting observers' performance was worse than predicted by the Same and Less conditions, and they were putting less weight on the more recent evidence. These differences in parameters are consistent with the model trying to mimic bounded evidence accumulation without a bound, providing additional support for the comparison described above.

Stage 3 of the model procedure was to account for the confidence ratings. We compared three processing architectures that span the space from single-channel to dual-channel (Maniscalco and Lau, 2016). We took as the null hypothesis a serial processing (single-channel) architecture in which the confidence ratings (Type-II decisions) can be described by the exact same evidence as used to make the perceptual (Type-I) decision. A weaker version of this null hypothesis is that the same suboptimal inference process is used for both perception and confidence, but that the observer can commit to their perceptual decision whilst continuing to monitor additional evidence for evaluating their confidence (a schematic of these processes is shown in **Figure S1a**). The average parameter values are shown in **Table S2**, labelled 'Serial' and 'Serial continued' respectively. Note the substantial increase in inference noise ( $\sigma$ ) and reduction in temporal bias ( $\alpha$  is closer to 1) when attempting to describe both the perceptual decision and the confidence rating compared to only the perceptual decision (**Table S1**, Replay task – bound, model  $c = 0$ ;  $l = 0.001$ ). This is indicative of the difficulty of describing both perception and confidence with the same suboptimalities.

At the other extreme is the parallel processing (dual-channel) architecture, in which perception and confidence are computed by independent resources, based on the same sensory input (**Figure S1b**, labelled 'Parallel' in **Table S2**). This is the most computationally expensive description, and provided a lack of parsimony that was only surpassed by a model that attempted to describe confidence ratings with only the inference noise evident from the perceptual decisions.

81 The intermediate models in this architectural space are the partial dissociation models (**Figure S1c**), which  
 82 suggest that confidence inherits the same noisy perceptual evidence as the perceptual decision, but may  
 83 incur some independent suboptimalities. We compared four versions of these models: same  $\sigma$  (no additional  
 84 inference noise); accumulation noise (additional inference noise with each sample of evidence); read-out  
 85 noise (one additional sample of noise before the confidence response); and same  $\alpha$  (the temporal bias  
 86 affecting the confidence accumulation is the same as that affecting the perceptual accumulation).

87 In all cases the models were fit to minimise the negative loglikelihood of both perceptual and confidence  
 88 decisions. The model comparison overwhelmingly favoured the partial dissociation models, and of these, the  
 89 best description was offered by a model with an independent temporal bias on the confidence evidence  
 90 accumulation, and additional noise at the read-out stage. We caution against interpreting this result as  
 91 meaning that there is no additional accumulation noise in the processing of confidence evidence, whilst the  
 92 models are very similar, it is possible that the read-out noise in this case can additionally capture some noise  
 93 in setting and maintaining bounds for assigning a rating to the confidence evidence.

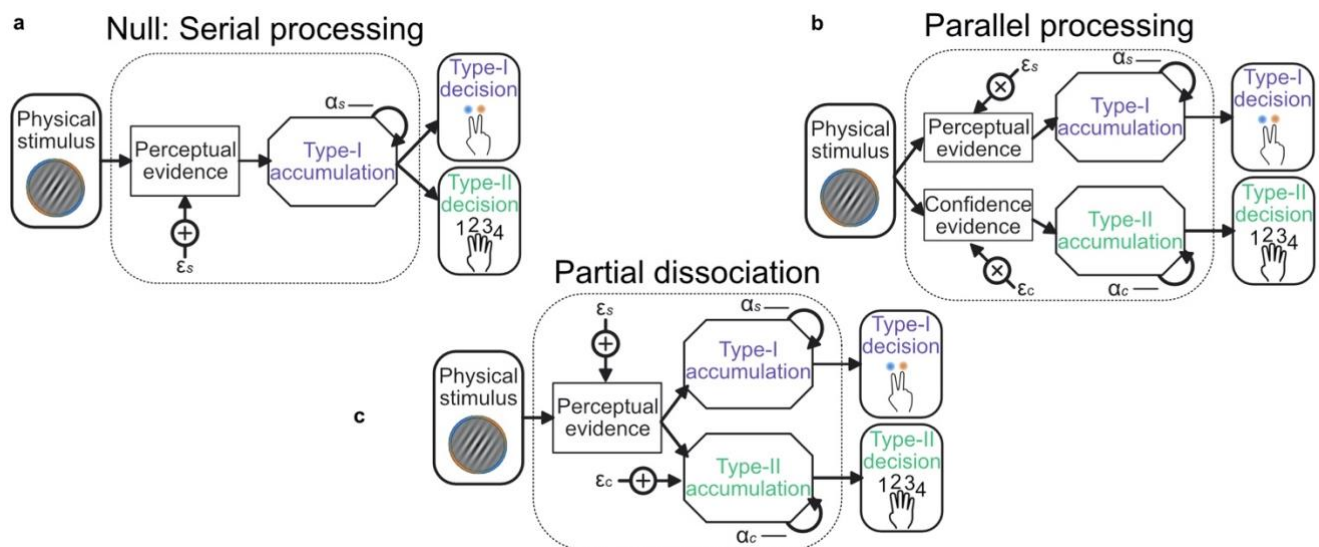

94

95 **Figure S1. Schematic of possible relationships between perceptual (Type-I) and confidence (Type-II)**  
 96 **evidence accumulation. a)** Same evidence accumulation processes: Type-I (perceptual) and Type-II  
 97 (confidence) decisions are different responses to the same evidence: each sample of perceptual evidence is  
 98 disrupted by a sample of sensory noise ( $\epsilon_s$ ) drawn from a zero-mean Gaussian with standard deviation  $\sigma$ , and  
 99 accumulated with a temporal bias described by  $\alpha_s$ . **b)** Parallel processing: Type-I and Type-II decisions rely on  
 100 entirely separate processing of the same physical stimulus: the confidence decision also incurs noise and  
 101 temporal integration bias (with subscript  $c$ ), but these may vary independently of the perceptual processing  
 102 suboptimalities (subscript  $s$ ). **c)** Partial dissociation: Type-I and Type-II decisions rely on partially dissociable  
 103 accumulation of the same evidence.

| Model                        | $\sigma$ | $\alpha$ | $a$  | $b$   | $\lambda$ | $a_c$ | $b_c$ | $\lambda_{c1}$ | $\lambda_{c2}$ | $\lambda_{c3}$ | LLH     | $\Sigma$ BIC |
|------------------------------|----------|----------|------|-------|-----------|-------|-------|----------------|----------------|----------------|---------|--------------|
| Serial                       | 0.73     | 0.92     | 0.10 | 12.74 | 17.07     | 0.07  | 0.64  | 1.28           | 6.81           | 31.38          | -428.36 | 18275.28     |
| Serial continued             | 0.67     | 0.91     | 0.13 | 9.60  | 17.98     | 0.06  | 0.53  | 0.66           | 7.08           | 30.41          | -424.88 | 18135.83     |
| Parallel                     | 0.76     | 0.90     | ~    | ~     | ~         | 0.01  | 0.58  | 0.18           | 7.51           | 30.68          | -437.25 | 18288.50     |
| Partial - same sigma         | 0.00     | 0.89     | ~    | ~     | ~         | 0.06  | 0.47  | 1.03           | 6.77           | 25.92          | -446.41 | 18540.68     |
| Partial - accumulation noise | 0.45     | 0.91     | ~    | ~     | ~         | 0.03  | 0.58  | 0.50           | 7.71           | 31.03          | -421.59 | 17662.25     |
| Partial - read-out noise     | 0.12     | 0.90     | ~    | ~     | ~         | 0.02  | 0.52  | 1.85           | 8.63           | 37.39          | -417.94 | 17516.29     |
| Partial - same alpha         | 0.12     | 0.88     | ~    | ~     | ~         | 0.02  | 0.52  | 0.98           | 8.22           | 35.16          | -423.02 | 17605.29     |

**Table S2. Average parameter values for perceptual and confidence behaviour.** Bound parameters with subscript  $c$  describe the criteria for confidence ratings, which take the same form as the perceptual decision bound. They have the same minimum and scale, but different rates of decline, such that  $\lambda_{c1}$  determines the upper bound on a confidence rating of 1, and the lower bound on a rating of 2. Apart from the 'Serial' and 'Serial continued' models, parameters for perceptual decisions were fixed to those fit in the winning perceptual decision model and the listed parameters affect only the confidence evidence accumulation.

The model comparison of Stage 3, just described mainly assumed continued, unbounded accumulation of confidence evidence (with the exception of the strictly serial processing architecture). Stage 4, was to formally compare bounded and unbounded accumulation for confidence evaluations in the same manner as with the perceptual decisions. This time, two versions of the bound were compared: the same bound as perceptual evidence accumulation (the participant could close their eyes after committing to their perceptual decisions and their responses would not change); or an independent bound (the participant can continue to accumulate evidence for confidence decisions after the committing to the perceptual decision, but will eventually stop). As reported in the manuscript, neither bound improved the fit, if anything, adding the bound decreased the log-likelihood of the model (same bound: relative improvement with bound = -0.007, bootstrapped  $p = 0.11$ , uncorrected; independent bound: relative improvement = -0.014,  $p = 0.022$ , Bonferroni corrected for two comparisons; **Figure 2c**, in the main text). This reflects the fact that even a very high bound affects the shape of the accumulation trace, which will harm the fit when behaviour is not affected by a bound.

In summary, this computational modelling procedure suggests a partial dissociation in the processing for perception and confidence. In the Replay task, perceptual decisions were best described by bounded evidence accumulation, enabling observers to commit to decisions before the sequence of presented samples finishes. The confidence ratings required additional noise and reduced temporal integration bias compared to the suboptimalities affected the perceptual decisions. These differences were best described by the partial dissociation architecture where confidence received the same noise samples of evidence as the perceptual decision, though they are accumulated differently. In addition, model comparison suggested confidence evidence accumulation continued to the end of the sequence, even in cases of premature commitment to the perceptual decision. The results of these comparisons replicate the results of Balsdon et al. (2020), with the exception of the confidence noise comparison: here we find evidence in favour of read-out noise, whereas the previous analysis found the models indistinguishable.

## 137 **Supplementary Note 2**

### 138 **Model Simulation**

139 The computational model comparison suggested a partial dissociation in the evidence used to make  
 140 perceptual decisions and confidence evaluations. We compared the evidence underlying the observers’  
 141 perceptual decisions and confidence ratings by simulating the winning computational model. For each trial,  
 142 10,000 samples of noise per decision update were randomly sampled from the Gaussian distribution  
 143 describing the observer’s inference noise. These were combined to give 10,000 simulated evidence traces  
 144 per trial. The first 1,000 simulated evidence traces that agreed with the observer’s response on that trial  
 145 were taken to measure the median evidence trace (or, the process was repeated until 1,000 adequate  
 146 simulated evidence traces were drawn, up to 100 repeats). **Figure S2a** demonstrates this process for one  
 147 example trial of one observer. For the perceptual evidence (**Figure S2a**, left) simulated evidence traces that  
 148 agreed with the observer’s response are those that reach the respective decision bound before the opposing  
 149 decision bound, or reach no bound but show evidence in favour of the response by the final sample. It was  
 150 assumed that once the evidence reaches the bound, that evidence is maintained until the response. For the  
 151 confidence evaluation (in the example, a confidence rating of 3), the final evidence had to be between the  
 152 confidence rating bounds to agree with the observer’s confidence decision (after the final sample of  
 153 additional noise – which is why a few samples in **Figure S2a**, right, exceed the bounds). The median  
 154 evidence was compared to the ideal evidence (green lines of **Figure S2a**).

155 The estimated inference error (used in **Supplementary Note 7**) scaled the difference between the median  
 156 consistent evidence and the ideal evidence by the probability of the response given all samples, to estimate  
 157 the relative deviation of the observers’ internal evidence from the optimal observer’s evidence. This estimate  
 158 of the error is quite imprecise: the median trace tends to be quite close to the ideal, even though any one of  
 159 the traces (which reflect much larger error) could have described the internal evidence of the observer.  
 160 **Figure S2b** shows the predicted final accumulated evidence for the perceptual (Type-I) compared to the  
 161 confidence (Type-II) decision for the same example observer. The evidence is strongly correlated but there  
 162 are substantial deviations, because of the additional noise, different temporal bias, and continued  
 163 accumulation for the confidence decision, especially in the More condition (light blue). The example  
 164 observer is a more extreme case because of the relatively strong bound on perceptual evidence  
 165 accumulation. The (Fisher transformed) correlation for each observer is shown in **Figure S2c**. For many  
 166 observers there are substantial differences between the median simulated evidence consistent with the  
 167 perceptual and confidence responses, meaning the simulated evidence could be useful in distinguishing  
 168 representations important for perception vs. confidence.



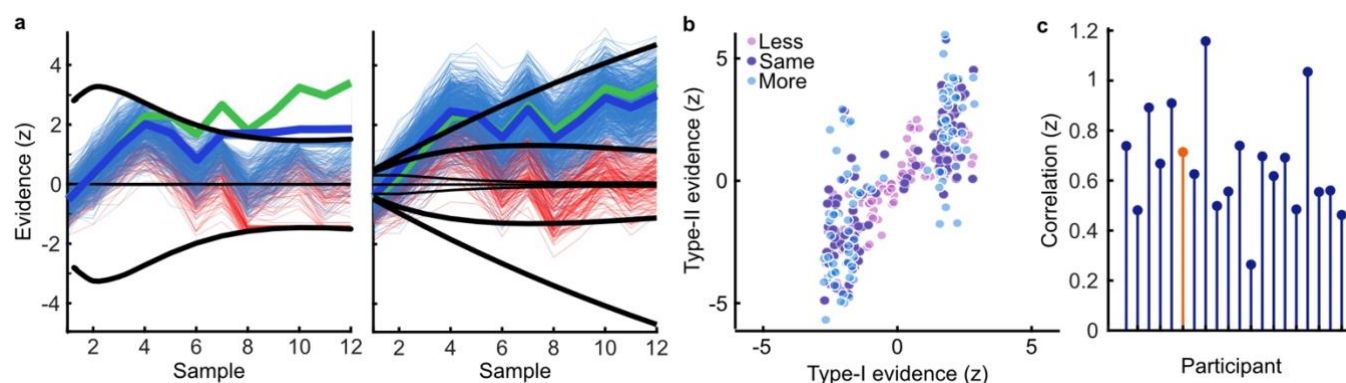

**Figure S2. Model simulation of accumulated evidence for perceptual and confidence decisions. a)** Example trial from one observer showing simulated evidence traces agreeing with the observer's response (blue) and a sample of example traces which did not agree (red). The perceptual decision is shown on the left. An evidence trace was taken to agree with the observer's decision if the corresponding bound was reached prior to the opposing bound, or if no bound was reached but the final accumulated evidence was in favour of the chosen option. The median evidence trace (thick blue line) was calculated assuming the evidence that reached the bound early was maintained until the response was entered. For the confidence rating (right) we compared the median evidence from traces where the final accumulator (plus one additional sample of noise) agreed with the observer's confidence rating. We examined the difference from the ideal accumulated evidence (thick green line) relative to the likelihood of the observers' rating given all simulated evidence traces. **b)** Median final simulated accumulated evidence for the perceptual decision (abscissa), and the confidence decision (ordinate) for all trials of the example observer, colours indicate the condition. **c)** Correlation (Fisher transformed  $z$ ) between perceptual and confidence evidence for each observer. The example observer is highlighted in orange.

## Supplementary Note 3

### Confidence behaviour

Proportion correct increased with increasing confidence, reflecting the observers' ability to use their confidence ratings to discriminate correct from incorrect responses (**Figure S3a**). Observers appeared to be monitoring the decision evidence to make their confidence ratings, as opposed to some proxy for confidence such as the number of samples they were shown (**Figures S3b and S3c**).

We required a single-trial measure of confidence precision for identifying the key neural processes underlying the computation of confidence. To do so, we compared observers' responses to an optimal observer. The optimal observer perfectly accumulates all presented evidence and assigns ratings to equally partition the evidence for their perceptual decision. To simplify, we split trials by the median evidence for the chosen category, where the optimal observer gives a high confidence rating (3 or 4) to those trials with greater than the median evidence, and a low confidence rating (1 or 2) to those with less than the median evidence. We labelled trials as 'suboptimal confidence' when the observer's confidence response disagreed with the response of this optimal observer. This trial labelling is demonstrated for two example observers in **Figure S3d**. We reasoned that on suboptimal confidence trials the internal evidence of the human observer

198 was less likely to be close to the optimal presented evidence, and the neural representation of the optimal  
199 presented evidence should be less precise in neural circuits that actually represent this suboptimal  
200 confidence evidence. That this measure of confidence precision does capture the suboptimalities in  
201 confidence evaluation is confirmed by the significant increase in model estimated confidence error on  
202 suboptimal confidence trials (Wilcoxon sign rank test:  $Z(19) = 3.85$ ,  $p < 0.001$ ; **Figure S3e**).

203 In this way, observers' confidence is assessed relative to a "super-ideal" observer, who has perfect access to  
204 the presented evidence (Mamassian and de Gardelle, under review). Theoretically, observers' confidence  
205 should be assessed relative to the internal evidence for their perceptual decision, that is, relative to the  
206 evidence based on suboptimal inference (afflicted by noise and temporal integration biases). However, the  
207 single-trial estimates of the internal evidence for perceptual decisions, based on model simulations, were  
208 relatively imprecise (see **Supplementary Note 2**), and could also introduce systematic errors from the  
209 model assumptions, making this estimate of the internal evidence unappealing for the purpose of assessing  
210 confidence. Moreover, the goal of this measure was to compare observers' confidence ratings to the neural  
211 representation of the accumulated evidence, which was also assessed relative to the optimal evidence. We  
212 therefore chose to assess confidence ratings relative to the optimal observer in the same way that neural  
213 responses were assessed relative to optimal, though this ignores the fact that some suboptimality is actually  
214 inherited from perceptual decision processes.

215 A second important consideration with this measure is that it is affected by confidence bias. There are three  
216 types of biases that could affect confidence ratings: first, a response bias to enter a certain response  
217 irrespective of the evidence; second, a miscalibration bias such that ratings mean different things to different  
218 observers (the same value of evidence will be given a rating of 4 for one observer and 3 for another, for  
219 example); third, a miscalculation bias such that perceptual evidence is relatively exaggerated or diminished in  
220 the assessment of confidence. All these biases mean that the same internal perceptual evidence could result  
221 in systematically different confidence ratings across observers, and observers could report on average  
222 higher or lower confidence despite similar perceptual performance and precision in representing the  
223 internal evidence for evaluating their confidence.

224 Taking an average proportion of suboptimal confidence ratings and comparing across observers would  
225 result in observers of similar ability having different scores simply because of biases in how they implement  
226 the confidence rating responses: greater biases will increase average proportion suboptimal. Importantly,  
227 this single-trial measure of confidence was not used for this purpose. Rather, it was compared to neural  
228 activity during the process of accumulating evidence for the perceptual decision and confidence evaluation.  
229 We expect that biases that are not of interest for the computation of confidence (in particular, response bias  
230 and miscalibration bias) are incorporated at a later stage, when the confidence evaluation is converted into a  
231 rating for executing the response. The biases will only reduce the sensitivity with which a trial labelled as  
232 suboptimal truly reflects internal evidence that differs from optimal, reducing our ability to identify neural  
233 processes underlying confidence computation. This is simulated in **Figure S3f**, where a relative bias is  
234 introduced by assessing human confidence ratings to a biased optimal observer (who responds on 65% of

235 trials with high confidence – making the human observers relatively more liberal, or 35% high confidence –  
 236 making the human observers more conservative). The general trend for the difference between confidence  
 237 ratings that match the (biased) optimal observer and those that are suboptimal remains the same, though  
 238 the bias reduces the difference.

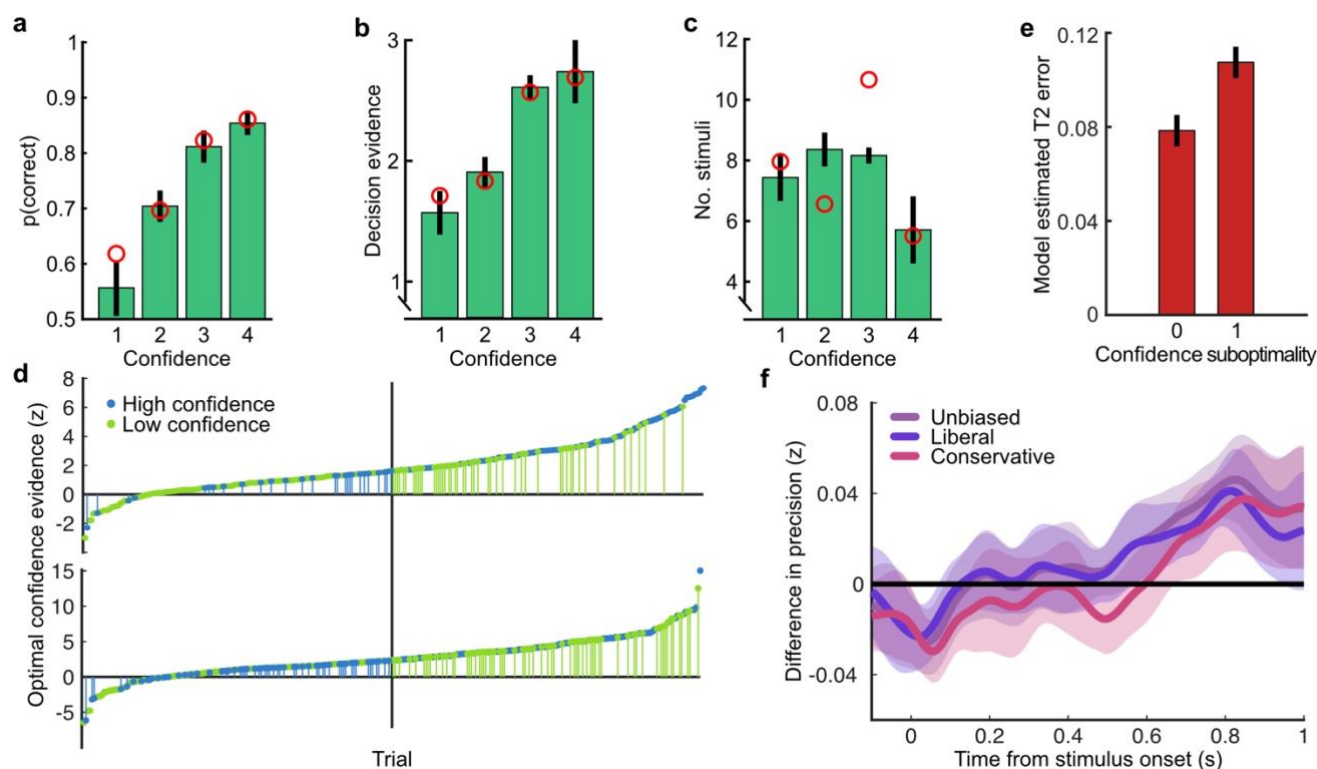

**Figure S3. Confidence behaviour.** **a)** proportion correct (in the perceptual decision) by confidence rating. **b)** Decision evidence (based on the presented samples) by confidence rating. **c)** Number of samples presented by confidence rating. In all plots, error bars show 95% within-subject confidence intervals. Red circles show the predictions of the best fitting confidence model (**Supplementary Note 1**). **d)** Confidence responses of two observers (top and bottom panels) on all trials sorted by the confidence evidence of the optimal observer. The median confidence evidence (shown by a black vertical line) defines an optimal confidence observer whose confidence above this median are rated high. Observers' high confidence ratings are shown in blue and low confidence ratings in green. Suboptimal confidence ratings, where human and optimal confidence observers do not match, are indicated with small vertical segments (green for Type-II misses and blue for Type-II false alarms). Negative confidence evidence corresponds to incorrect perceptual decisions. The observer shown on top clearly has fewer suboptimal responses compared with the observer below, and the frequency of suboptimal responses decreases further from the median. **e)** Model estimated confidence error by confidence rating suboptimality (0 = the observer's confidence rating was the same as the optimal observer, 1 = suboptimal confidence rating). **f)** The effect of response bias on the analysis of suboptimal confidence in the EEG representation of accumulated evidence. Observers' confidence ratings were compared to an unbiased optimal observer (purple), and two biased (but otherwise optimal) observers, who respond with high confidence on 35% and 65% of trials (making the human observers relatively more liberal and conservative with their response strategy in comparison). Thick lines show the within-subject difference in precision (Fisher transformed

correlation) between trials where the human observers' confidence ratings correspond to the (un/biased) optimal observer and suboptimal confidence ratings. Shaded regions show the 95% between-subject confidence intervals on the difference.

## Supplementary Note 4

### Response classification

A linear discriminant analysis was used to classify the perceptual decision response based on the spectral power of band-limited EEG signals in epochs locked to the time of the response. The spectral power across frequency tapers from 1 to 64 Hz with 25% spectral smoothing was resolved using wavelet convolution implemented in FieldTrip (Oostenveld et al., 2011). The epochs were then clipped at -3 to 1 s around the time of entering the perceptual decision response. We first trained and tested at each frequency taper at each time point in the Free task (**Figure S4a**). Classifier performance was measured as the area under the curve (AUC). The power in frequency bands between 8 and 32 Hz yielded the most accurate classification performance. The difference in the average power across these frequency bands between -0.5 and 0.5 seconds around the time of the response for right- and left-handed responses showed a clear lateralisation over central and parietal electrodes (**Figure S4b**). Training and testing at each time point in each condition of the Replay task showed a similar pattern to the Free task, with reliable classifier performance from around -0.5 to 0.5 seconds around the response (**Figure S4c**). Training and testing within each condition of the Replay task resulted in a larger between-subject error, likely because there are only 100 trials per condition. In the main text, we present a cross-classification analysis where the classifier is trained on the Free task, and tested on each condition in the Replay task, which more directly examines when the signals relevant for entering a response (based on the Free task) emerge during the lead up to the response in each condition of the Replay task.

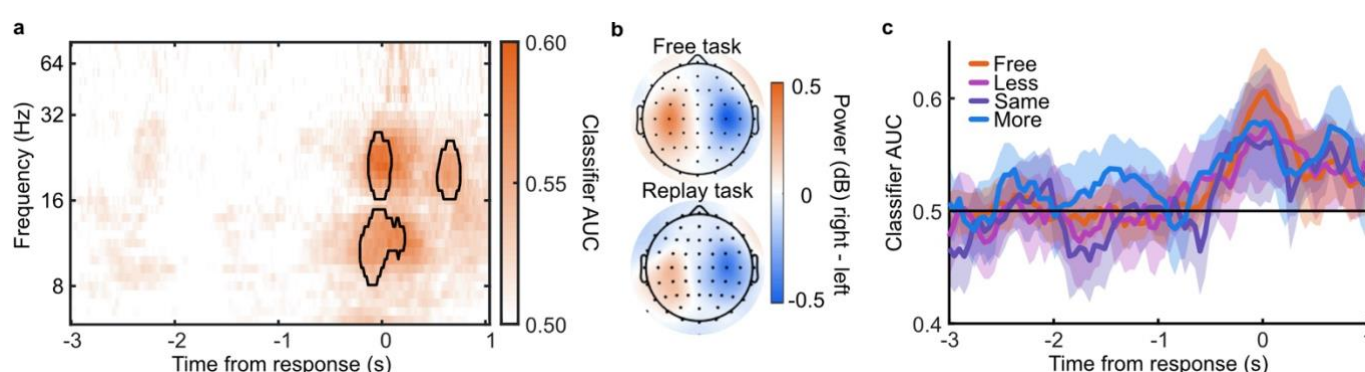

**Figure S4. Response Classification analysis. a)** Classifier AUC training and testing at each time point (abscissa) based on the power (dB) in each frequency band (ordinate). Clusters where average performance is greater than 3.1 standard deviations (99% confidence) from baseline (0.5) are circled in black. **b)** Scalp map of the difference in power for right- compared to left-handed responses averaged over 8 to 32 Hz and -0.5 to 0.5 seconds around the response. **c)** Classifier performance (AUC) training and testing at each time point, in each condition of the Replay task and in the Free task.



## 287 **Supplementary Note 5**

### 288 **Encoding variable regression**

289 Linear regression was used to examine the representation of encoding variables in the EEG signals. First,  
290 regression weights ( $\hat{W}$ ) were computed using ridge regression of the encoding variables ( $C$ , an  $n \times 1$  matrix)  
291 on the EEG signals ( $D$ , an  $n \times m$  matrix, where  $m$  is the number of EEG signals, and  $n$ , the number of epochs):

$$\hat{W} = (D^T D + \lambda I)^{-1} D^T C \quad (4)$$

292 The regularisation parameter,  $\lambda$ , was set to 1, where  $I$  is the identity matrix. Weights were computed on 90%  
293 of the epochs, and used to predict the encoding variables on the other 10% (10-fold cross validation) simply  
294 as:  $\hat{C} = D * \hat{W}$ . The precision of the prediction was calculated as the correlation between  $\hat{C}$  and  $C$ ,  
295 standardised using a Fisher transformation.

296 Three different encoding variables,  $C_\theta$ ,  $C_\ell$ , and  $C_z$ , were examined (**Figure S5a**): the stimulus orientation  
297 ( $C_\theta = \pi - |\theta_n|$ ), the momentary decision update ( $C_\ell = |\ell_n| = |\kappa \cos(2(\theta_n - \mu_1)) - \kappa \cos(2(\theta_n - \mu_2))|$ ),  
298 and the accumulated evidence ( $C_z = z_n = \sum_{N=1}^n \ell_N$ , signed by the response). These variables are not  
299 entirely independent: There is a weak correlation between the stimulus orientation and the momentary  
300 decision update ( $r = 0.03$ ), and a weak correlation between the momentary decision update and the  
301 accumulated evidence ( $r = 0.09$ ). In addition, the accumulated evidence is strongly correlated over samples  
302 ( $r = 0.92$  at  $n+1$ , and  $r = 0.85$  at  $n+2$ ). The cross-correlations are shown in **Figure S5c**.

303 The EEG signals in  $D$  were low-pass filtered and decomposed into real and imaginary parts using a Hilbert  
304 transform. Regression precision was first calculated using the signals from all electrodes ( $m = 128$ )  
305 separately for each time-point in the stimulus-locked epochs. Initial analysis showed a low-pass cut-off of 8  
306 Hz was appropriate to decrease noise whilst maintaining precision (**Figure S5b**). The previous literature has  
307 shown similar results (Salvador et al., 2020).

308 Temporal generalisation of the representation of encoding variables was tested by computing weights at  
309 each time point and testing the predicted encoding variables across time (**Figure S5d**). Though the  
310 representation of the momentary decision update is maintained for a relatively longer duration than the  
311 representation of stimulus orientation, there is little temporal generalisation, suggesting the representation  
312 in the EEG signals evolves over time. This is also the case for the representation of accumulated evidence,  
313 however, there are also strong off-diagonals in the temporal generalisation matrix. This is likely because of  
314 the strong correlation across consecutive samples (**Figure S5c**).

315 The precision of the representation of accumulated evidence was compared across the Less and More  
316 conditions for the first four and the last four stimuli (**Figure S5e**). As reported in the main text,  
317 representation precision was substantially attenuated for the last four stimuli of the More condition. This  
318 was not the case for the first four samples, where decoding precision in the More condition was briefly (from



132 to 244 ms) greater than in the Less condition ( $t_{ave}(19) = 3.67, p_{cluster} < 0.001$ ).

Given the sustained precision of decoding accumulated evidence over time, and the strong correlation between consecutive samples, it is curious that the measured precision does drop to baseline at the start of the epoch. That the same pattern is found when decoding sample  $n-1$  and sample  $n+1$  based on the epoch at sample  $n$  (**Figure S5f**) suggests that the onset of the stimulus is disrupting the ongoing representation (or at least, our ability to measure it). Furthermore, this decrease in performance is not seen in the temporal generalisation matrix, where the off-diagonal is not aligned with the onset of successive samples (due to the jitter in stimulus presentation timing). Comparing precision between groups of epochs where the timing of the subsequent sample is aligned (**Figure S5g**; red 317 ms, green 333 ms, blue 350 ms) suggests there could be an interaction between the timing of ongoing updates and the precision of the representation of the accumulated evidence (but not the momentary decision update). This could be of interest for future research.

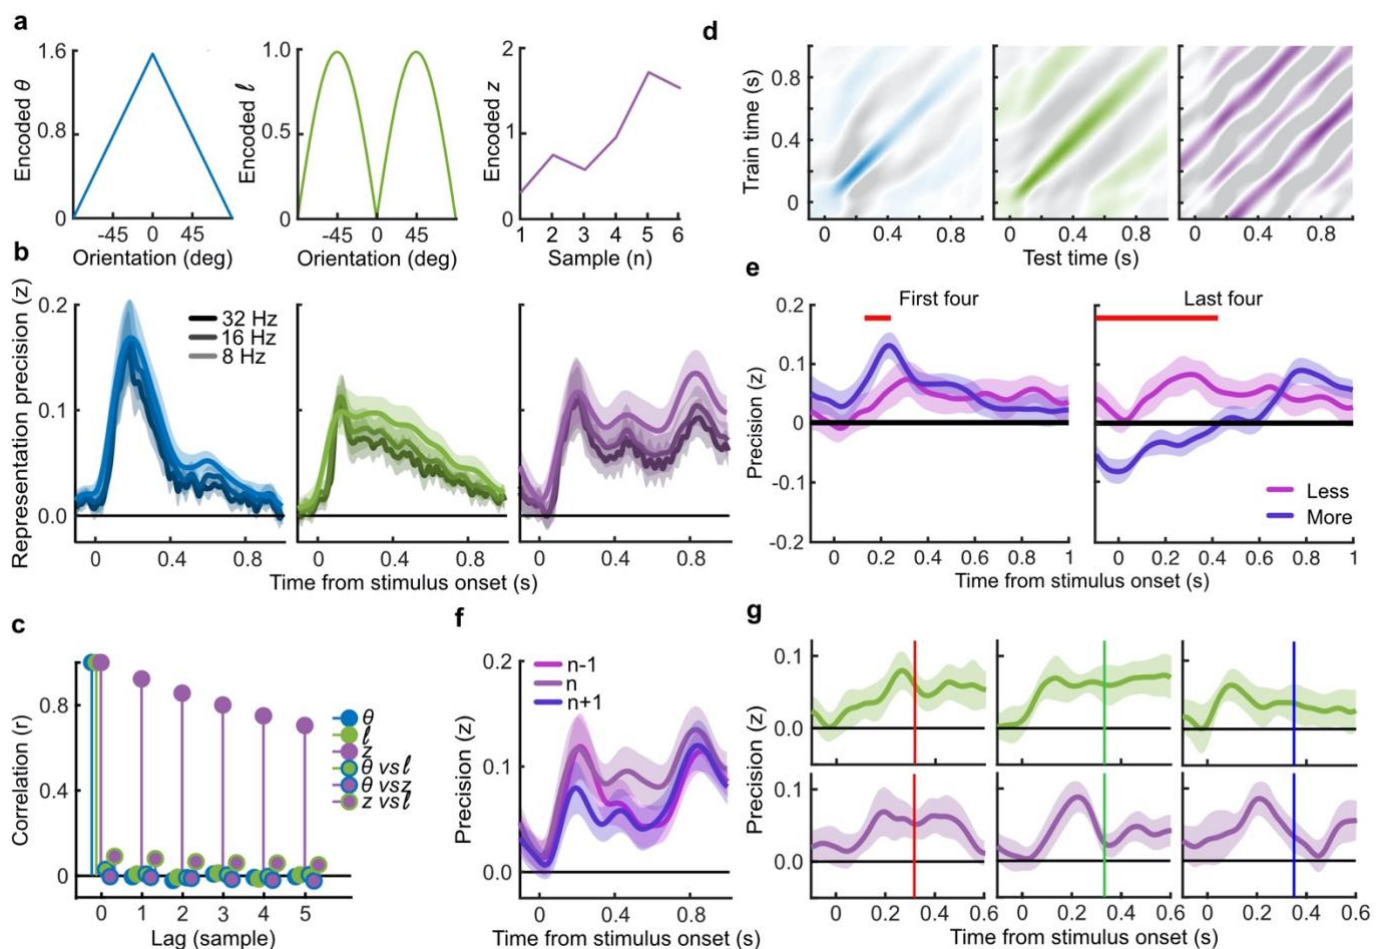

**Figure S5. Encoding variable regression.** **a)** Encoded variables used to regress EEG signals. The encoded orientation ( $C_\theta$ , left) and encoded momentary decision update ( $C_l$ , middle) were dependent on the orientation presented to the observer. The encoded accumulated evidence ( $C_z$ ) varied over all presented orientations in a trial, the figure on the right shows only one example. **b)** Representation precision of encoding variables using different low-pass filters. **c)** Cross correlation between encoding variables over consecutive samples. **d)** Temporal generalisation of representations: the regression weights were calculated on EEG signals at each time

point and precision was tested across time. Colour scales are relative to the maximal precision, with zero precision in white and negative in grey (a sign flip of the regression weights). **e)** Representation precision of the accumulated evidence for the first (left) and last (right) four stimuli of the Less and More conditions. Shaded error bars show the 95% within subject confidence intervals, red horizontal bars mark cluster corrected significant differences between conditions. **f)** Representation precision of the previous ( $n-1$ ), current ( $n$ ) and future ( $n+1$ ) accumulated evidence, based on the EEG signals locked to the current epoch. **g)** Representation precision of the momentary decision update (top) and the accumulated evidence (bottom) for epochs separated by the timing of the subsequent stimulus, shown in coloured bars (317 ms, red, left; 333 ms, green, middle; and 350 ms blue, right).

## Supplementary Note 6

### Cluster modelling

Cluster modelling was used to isolate contiguous signals in space (electrode location) and time, where the precision of the representation of accumulated evidence systematically varied with the suboptimalities evident from behavioural responses. Suboptimal responses result from greater inference error, where the internal representation of the accumulated evidence deviates further from the presented evidence, thus neural signals that reflect the internal evidence of the observer should also deviate further from the optimal evidence used in the regression. Clusters were isolated using a multivariate Bayesian scan statistic (Neill, 2011; Neill, 2019). This statistic was calculated based on the loglikelihood ratio of the alternative hypothesis (that representation precision depends on the inference noise of the observer) against the null hypothesis (that any difference in representation precision is due to measurement noise alone, which is independent across epochs). It is assumed that the neural signals reflect the input (cumulative presented evidence) with added measurement noise ( $N_m$ ) and, when the neural signals are relevant for behaviour, inference noise ( $N_i$ ) that reflects the observers' suboptimal internal representation of the decision evidence:

$$Y_{out} = Y_{in} + N_i + N_m \quad (5)$$

Where the two sources of noise are assumed to be gaussian distributed ( $N(0, \sigma^2)$ ). The total measured correlation ( $r_T$ ) between  $Y_{in}$  and  $Y_{out}$  is a function of the additional noise (where  $Y_{in}$  is normalised):

$$r_T = \frac{1}{\sqrt{2 + \sigma_i^2 + \sigma_m^2}} \quad (6)$$

The observer makes suboptimal decisions when the inference noise pushes their internal representation of the accumulated evidence further from the true value, resulting in a weaker correlation between the internal representation and the presented evidence. Therefore, when we split based on behaviour, we expect that on average there is greater inference noise on incorrect trials than correct trials. The correlation over all samples can be described as:

$$r_T = \frac{1}{\sqrt{2 + p(I)\sigma_{il}^2 + p(C)\sigma_{ic}^2 + \sigma_m^2}} \quad (7)$$

Where  $p(I)$  is the observed probability of a suboptimal decision, and  $p(C)$ , a decision that corresponds to that of the optimal observer. The null hypothesis is that the neural signal is not relevant for behaviour, specifically, signals on suboptimal trials do not reflect additional inference noise. Any difference in the correlation is due to variance in the measurement noise.

$$H_0: \sigma_{il} = \sigma_{ic} = 0 \quad (8)$$

The alternative hypothesis is that the neural signals are relevant for behaviour, reflecting the greater noise on trials where the observer makes a suboptimal decision.

$$H_1: \sigma_{il} > \sigma_{ic}, \text{ or } \sigma_{il}^2 = (\sigma_{ic}^2 - x) \text{ where } x > 0 \quad (9)$$

The difference in the inference noise is limited by the total variance:

$$p(I)(\sigma_{il}^2) + p(C)(\sigma_{il}^2 + x) = \frac{1}{r_T^2} - 2 - \sigma_m^2 \quad (10)$$

Solving for  $\sigma_{il}^2$  (since  $p(C) + p(I) = 1$ ):

$$\sigma_{il}^2 = \frac{1}{r_T^2} - 2 - \sigma_m^2 - p(C)x \quad (11)$$

If we consider the correlation between the neural representation and the presented evidence on trials with optimal responses and suboptimal trials separately (for simplicity, let  $R = \frac{1}{r_T^2}$ ):

$$r_I = \frac{1}{\sqrt{R - p(C)x}} \quad (12)$$

378

$$r_C = \frac{1}{\sqrt{R - p(C)x - x}} \quad (13)$$

Setting a uniform prior on the ratio of inference and measurement noise, results in a linearly descending prior on  $x$ :

$$p(x) = \frac{R - 2 - p(I)x}{\int_0^{(R-2)/p(I)} R - 2 - p(I)x \, dx} \quad (14)$$

We actually measure the difference in the Fischer transform of the correlation:

$$z_C - z_I = 0.5 \log \left( \frac{(1 + r_C)(1 - r_I)}{(1 - r_C)(1 + r_I)} \right) \quad (15)$$

Since  $r_C$  and  $r_I$  are independent of the assumed measurement noise, there is one  $x$  that corresponds to a measured difference  $z_C - z_I$ , given the overall correlation  $r_T$ .

For each participant, for each electrode, at each time-point, the prior on  $\sigma_m^2$  for  $H_0$  is calculated by permuting the data labels (accurate vs inaccurate behavioural responses). The probability of the data given  $H_0$  and  $H_1$  are calculated as above and used to compute the loglikelihood ratio:

$$LLR = \log \left( \frac{p(D|H_1)}{p(D|H_0)} \right) \quad (16)$$

The clusters are identified using the Fast Subset Sums procedure: The loglikelihood ratios are summed across participants, for each electrode and time-point. We then find small clusters by thresholding the log posterior odds ratio:

$$POR = LLR + \log \left( \frac{p(H_1)}{p(H_0)} \right) \quad (17)$$

Where the prior  $p(H_1)$  is set to 0.05. The cluster with the largest LLR (summed across electrodes and time points) is then expanded by continuing to add the largest neighbour and the new log prior ( $p(H_1) = 0.05/n$ ), where  $n$  is the size of the cluster, whilst the POR remains in favour of  $H_1$ . This is repeated until all clusters with evidence in favour of  $H_1$  have been identified.

## Supplementary Note 7

### Estimating single-sample confidence inference error

We aimed to examine the neural processes that are important for the precise representation of the decision evidence for computing confidence. To do so, we explored the source(s) of the noise affecting the neural representation of the accumulated evidence in the clusters of signals identified as relevant for suboptimal confidence evaluations. We used the representation error as an estimate of the inference error of the observer: the absolute difference between the cluster predicted value and the expected value given the cluster representation and the true value of accumulated evidence based on the orientations presented to the observer. This estimate is likely substantially affected by measurement noise, in addition to the inference error of the observer. However, we do not expect measurement noise to be systematically driven by a specific source, especially not across subjects. Noise Min and Noise Max epochs were selected by taking the top and bottom quartiles of epochs sorted by representation error.

A separate estimate of the inference error was obtained by simulating the computational model (Figure S6a shows the process of obtaining these estimates and their mutual reliance on the input stimulus variables and the behavioural output). This measure also has its drawbacks: It is relatively imprecise, given the large range

of errors that are consistent with the observers' behavioural responses (see **Supplementary Note 2**); and is based on the assumptions of the model. By examining these two estimates, we avoid relying on the same set of assumptions throughout the analysis. The correlation between these estimates suggests that they do tap into the suboptimal inference of the observer.

We considered how the different measures vary across samples and by the division in Noise Min and Noise Max epochs. **Figure S6b** shows the correlation of these measures, averaged across subjects. The average absolute effect size of the within subject difference between different variables dividing trials by Noise Min and Noise Max epochs is shown in **Figure S6c**. There was a larger effect on confidence inference error ( $d = 0.06$ ) than perceptual inference error ( $d = 0.02$ ), from the model estimate. There were some effects on stimulus variables: a small effect of condition (More vs Less,  $d = 0.03$ ), a large effect on sample position in the sequence (Noise Min epochs tended to correspond to earlier samples,  $d = 0.2$ ), and an effect on decision update (Noise Min epochs tended to correspond to smaller momentary decision updates,  $d = 0.08$ ). The effects on behaviour were largest for confidence accuracy ( $d = 0.06$ ), with limited effect on perceptual accuracy ( $d = 0.02$ ) and confidence rating (Noise Min epochs were somewhat more associated with high confidence ratings,  $d = 0.03$ ).

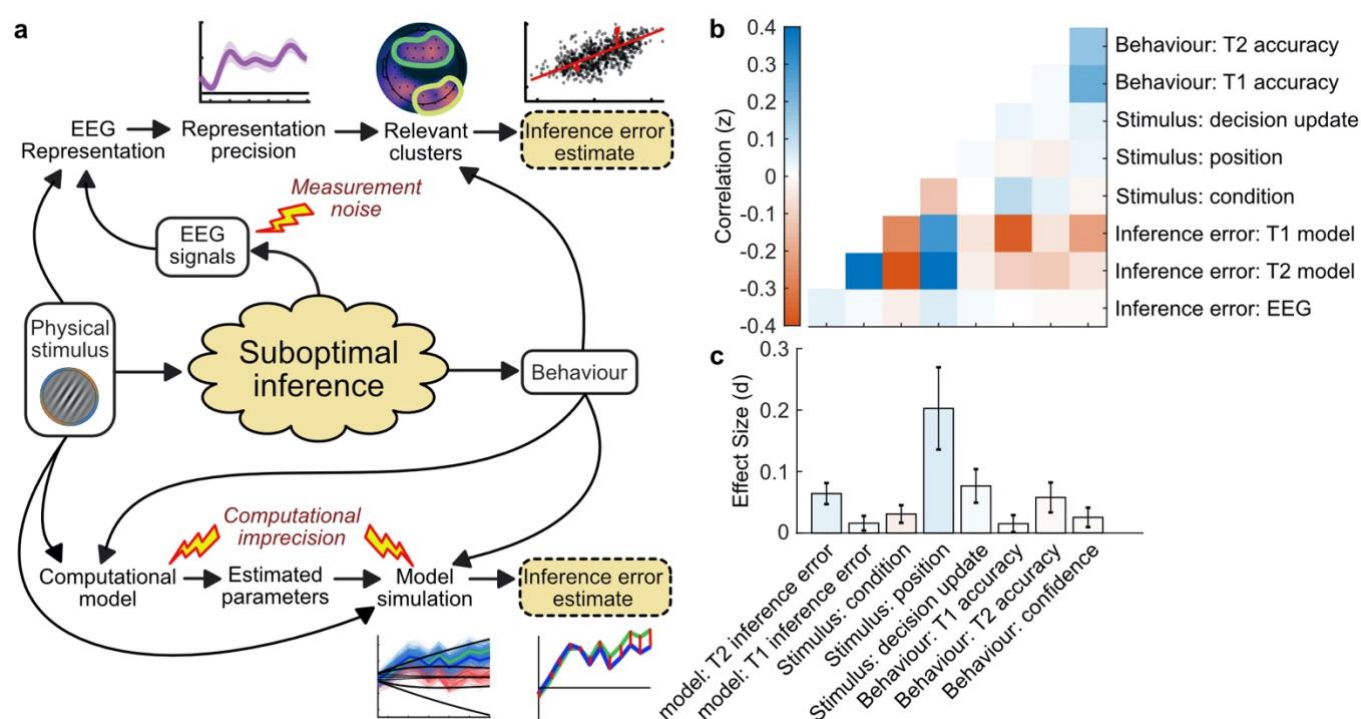

**Figure S6. Estimating inference error.** **a)** Two approaches to estimate inference error. It is assumed the observer's behaviour is based on a suboptimal inference over the physical stimulus. We do not have access to the single-sample inference error, but can estimate it using the measured variables: the physical stimulus properties, the behaviour, and the EEG signals. Two approaches are outlined: The EEG inference error estimate, which relies on the error of the representation of the accumulated evidence, in clusters where the precision of the representation is related to suboptimal behaviour; and the model error, which relies on simulating the processing of the evidence based on the fitted model parameters, and taking the median of simulated traces



which concur with the observer's response. **b)** Correlation between variables measured from behaviour, the stimulus input, and the estimated inference error. **c)** Effect size on the difference between Noise Min and Noise Max epochs.

## Supplementary Note 8

### Regions of interest

Regions of interest were selected based on the previous literature. Specifically, Herding et al. (2019) found subjective evidence to modulate activity in the Superior Parietal Cortex; Gherman and Philiastides (2018) found correlates of confidence encoding in the ventro-medial Prefrontal cortex (overlapping with the MindBoggle Orbitofrontal Cortex coordinates), whilst Graziano et al., (2015) examined ROIs in the Anterior Cingulate cortex, Orbitofrontal cortex, Temporal lobe, Posterior Parietal cortex, and Occipital cortex. We chose to use ROIs defined by MindBoggle (Klein et al., 2017) that corresponded to similar regions: Lateral Occipital cortex, Superior Parietal cortex, Orbitofrontal cortex (combining medial and lateral partitions), rostral Middle Frontal cortex, and initially the Anterior Cingulate Cortex (combining rostral and caudal partitions; **Figure S7a**). The results of the Anterior Cingulate Cortex were similar to the neighbouring Orbitofrontal region, so we decided not to present this in the manuscript for simplicity. We show the results in **Figure S7b**, for left and right hemispheres separately (statistical analyses were performed on the average).

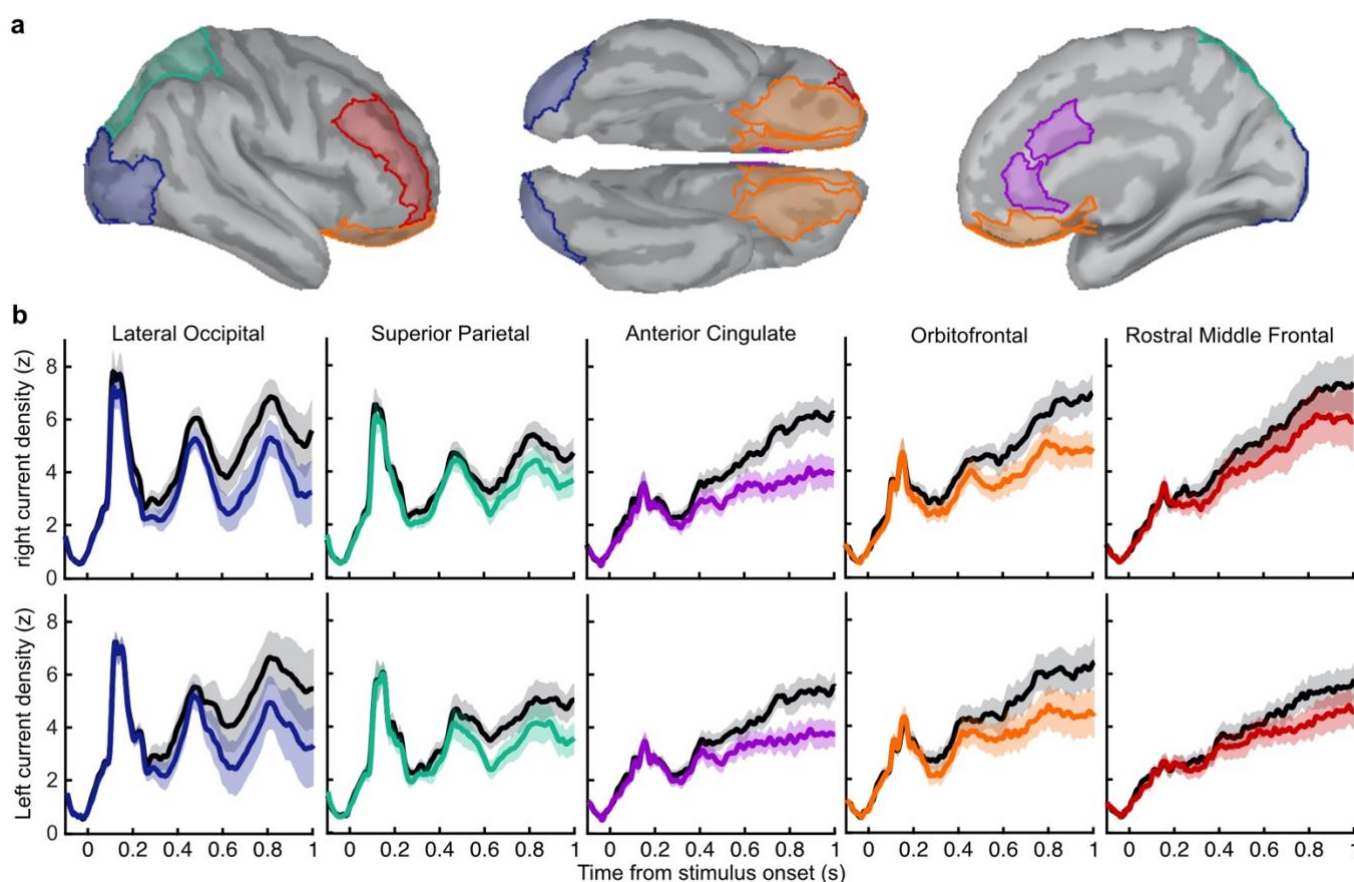

**Figure S7. Regions of interest and corresponding current density. a)** Regions of interest based on

451 *Mindboggle coordinates. **b)** Average normalised rectified current density in the right (top) and left (bottom)*  
 452 *hemispheres. Noise Min epochs are shown coloured, Noise Max in black, with shaded regions showing the 95%*  
 453 *within-subject confidence interval.*

# References

- Balsdon, T., Wyart, V., & Mamassian, P. Confidence controls perceptual evidence accumulation. *Nature Communications*, 2020; **11**(1), 1-11
- Klein, A., Ghosh, S. S., Bao, F. S., Giard, J., Häme, Y., Stavsky, E., ... & Keshavan, A. Mindboggling morphometry of human brains. *PLoS Computational Biology*, 2017; **13**(2), e1005350.
- Mamassian, P., & de Gardelle, V. Modelling perceptual confidence and the confidence forced-choice paradigm. *Under Review*.
- Maniscalco, B., & Lau, H. The signal processing architecture underlying subjective reports of sensory awareness. *Neuroscience of Consciousness*, 2016; **1**.
- Neill, D. B. Fast Bayesian scan statistics for multivariate event detection and visualization. *Statistics in Medicine*, 2011; **30**(5), 455-469.
- Neill, D. B. Bayesian Scan Statistics. In: Glaz J., Koutras M. (eds) *Handbook of Scan Statistics*. 2019; Springer, New York, NY.
- Oostenveld, R., Fries, P., Maris, E., & Schoffelen, J. FieldTrip: open source software for advanced analysis of MEG, EEG, and invasive electrophysiological data. *Computational Intelligence and Neuroscience*, 2011.
- Salvador, A., Arnal, L. H., Vinckier, F., Domenech, P., Gaillard, R., & Wyart, V. Premature commitment to uncertain beliefs during human NMDA receptor hypofunction. *bioRxiv* 2020
